# Supplementary material for: Exoergic pathways triggered by O/H radicals in different metallic carbohydrazide perchlorates (M2+= Mn2+, Fe2+, Co2+, Ni2+, Zn2+and Cd2+)
Source: Royal Society of Chemistry journal article supplement (doi:10.1039/d2cp00729k), 2022-01-01
Supplement: d2cp00729k1.pdf [file d2cp00729k1.pdf]

## Supplementary Information of

### Exoergic pathways triggered by O/H radicals in different metallic carbohydrazide perchlorates ( $M^{2+} = Mn^{2+}, Fe^{2+}, Co^{2+}, Ni^{2+}, Zn^{2+}$ and $Cd^{2+}$ )

Xiaohui He,<sup>‡<sup>a</sup></sup> Panpan Wu,<sup>‡<sup>a</sup></sup> Xin Huang,<sup>a</sup> Chaohua Dai,<sup>a</sup> Changshun Li,<sup>a</sup> Longjiu Cheng,<sup>a</sup> Tonglai Zhang,<sup>\*<sup>c</sup></sup> Jianguo Zhang<sup>\*<sup>c</sup></sup> and Kun Wang<sup>\*<sup>a,b</sup></sup>

<sup>a</sup>Department of Chemistry, Anhui University, Hefei, Anhui 230601, P. R. China

<sup>b</sup>Key Laboratory of Structure and Functional Regulation of Hybrid Materials (Anhui University), Ministry of Education; Hefei, Anhui 230601, P. R. China

<sup>c</sup>State Key Laboratory of Explosion Science and Technology, Beijing Institute of Technology, Beijing 100081 P. R. China

---

<sup>‡</sup>These two authors contributed equally to this work.

\* Corresponding authors: Kun Wang, Tel & Fax: +86 551 63861279. E-mail: wangkun@ahu.edu.cn; Tonglai Zhang, E-mail: [ztlbit@bit.edu.cn](mailto:ztlbit@bit.edu.cn); Jianguo Zhang, E-mail:

[zjgbit@bit.edu.cn](mailto:zjgbit@bit.edu.cn)

## Contents

|                                                                                                                                                                                                                                                                            |       |
|----------------------------------------------------------------------------------------------------------------------------------------------------------------------------------------------------------------------------------------------------------------------------|-------|
| <b>Fig. S1 ~ S5.</b> The convergence curves of the temperature of ions ( $T_{ions}$ ), kinetic energies of virtual electrons ( $e_{kinc}$ ) and the total electronic energies ( $e_{tot}$ ) of MCPs ( $M^{2+} = Mn^{2+}, Fe^{2+}, Co^{2+}, Ni^{2+},$ and $Cd^{2+}$ ) ..... | 1-3   |
| <b>Fig. S6~Fig. S10.</b> The relationship between the total energy and the simulation time/temperature of MCPs ( $M^{2+} = Mn^{2+}, Fe^{2+}, Co^{2+}, Ni^{2+},$ and $Cd^{2+}$ ) .....                                                                                      | 4-6   |
| <b>Fig. S11.</b> The molecular structures, parameters and Wiberg bond index of coordinative bonds (WBI) of (a)-(e) $[M(CHZ)_2]^{2+}$ ( $M^{2+} = Mn^{2+}, Fe^{2+}, Co^{2+}, Ni^{2+}, Zn^{2+}$ and $Cd^{2+}$ ) under the level of m062x/def2tzvp .....                      | 7     |
| <b>Fig. S12</b> The optimized crystal structures of CHZ, $[CHZ^{2+}(ClO_4^-)_2]$ and six MCPs ( $M^{2+} = Mn^{2+}, Fe^{2+}, Co^{2+}, Ni^{2+}, Zn^{2+}$ and $Cd^{2+}$ ) .....                                                                                               | 8     |
| <b>Fig. S13 ~ Fig. S18.</b> The density of states (DOS) and partial density of state (pDOS) of the six MCP ( $M^{2+} = Mn^{2+}, Fe^{2+}, Co^{2+}, Ni^{2+}, Zn^{2+}$ and $Cd^{2+}$ ) .....                                                                                  | 9-14  |
| <b>Fig. S19.</b> Molecular structure, Hirshfeld surfaces and fingerprint plot for understanding the intermolecular interactions among CHZ, $M^{2+}$ and $ClO_4^-$ .....                                                                                                    | 15    |
| <b>Fig. S20~S24.</b> The snapshots of the typical products of of MCPs ( $M^{2+} = Mn^{2+}, Fe^{2+}, Co^{2+}, Ni^{2+},$ and $Cd^{2+}$ ) .....                                                                                                                               | 16-19 |
| <b>Scheme S1.</b> The decomposition pathways of CHZ. ....                                                                                                                                                                                                                  | 20    |
| <b>Scheme S2.</b> The decomposition pathways of $[CHZ^+(ClO_4^-)]$ . ....                                                                                                                                                                                                  | 21    |
| <b>Scheme S3~Scheme S7.</b> The decomposition pathways of MCPs ( $M^{2+} = Mn^{2+}, Fe^{2+}, Co^{2+}, Ni^{2+}$ and $Cd^{2+}$ ) .....                                                                                                                                       | 22-26 |
| <b>Table S1~Table S5.</b> The Cartesian coordinates of $[M(CHZ)_2]^{2+}$ ( $M^{2+} = Mn^{2+}, Fe^{2+}, Co^{2+}, Ni^{2+}$ and $Cd^{2+}$ ) of the optimized structure under the level of m062x/deftzvp. ....                                                                 | 27-31 |
| <b>Table S6.</b> The syngony, symmetry, band gaps, cell parameters, selected atomic charges, typical bond lengths and bond angles of crystal CHZ, $[CHZ^+(ClO_4^-)]$ and MCPs .....                                                                                        | 32    |
| <b>Table S7.</b> The temperature of ions ( $T_{ion}$ ), kinetic energies of virtual electrons ( $e_{kinc}$ ) and the total electronic energies ( $e_{tot}$ ) of MCPs ( $M^{2+} = Mn^{2+}, Fe^{2+}, Co^{2+}, Ni^{2+}$ and $Cd^{2+}$ ) .....                                 | 33    |

To satisfy the requirements of the simulation, we test the virtual mass of electronics and the cut off energy to make sure the systems are adiabatic with appropriate force fields for all the atoms before increasing the temperature. The average value of the temperature of ions ( $T_{ion}$ ), kinetic energies of virtual electrons ( $e_{kinc}$ ) and the total electronic energies ( $e_{tot}$ ) in a 2000-step simulation without any thermostat (Table S10 ~ S14).

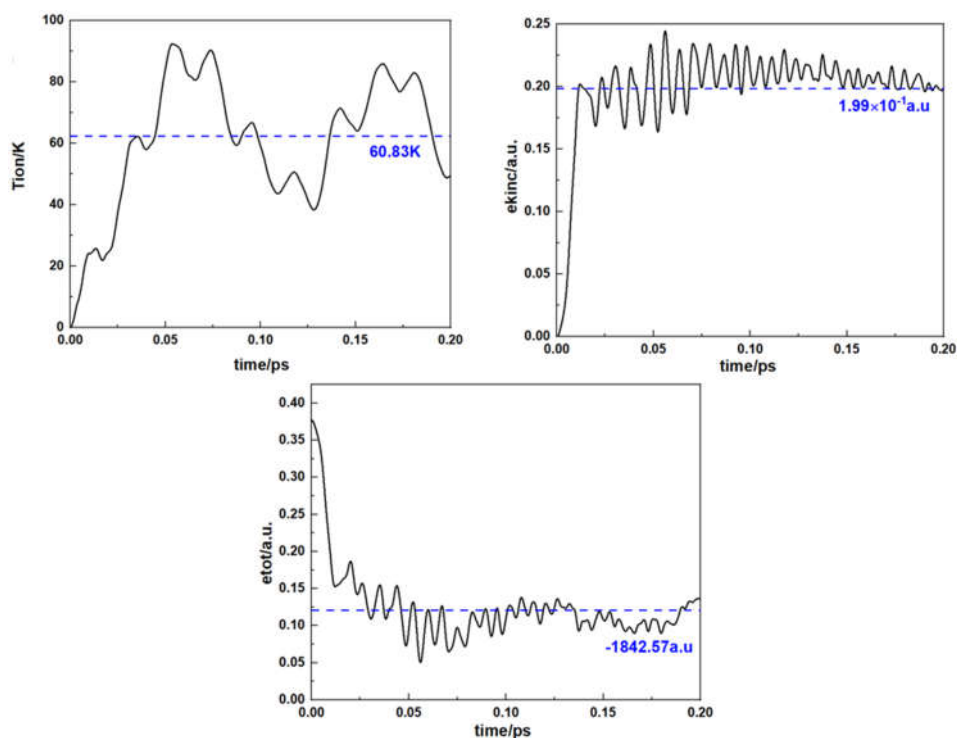

**Fig. S1.** The convergence curves of the temperature of ions ( $T_{ions}$ ), kinetic energies of virtual electrons ( $e_{kinc}$ ) and the total electronic energies ( $e_{tot}$ ) of MnCP

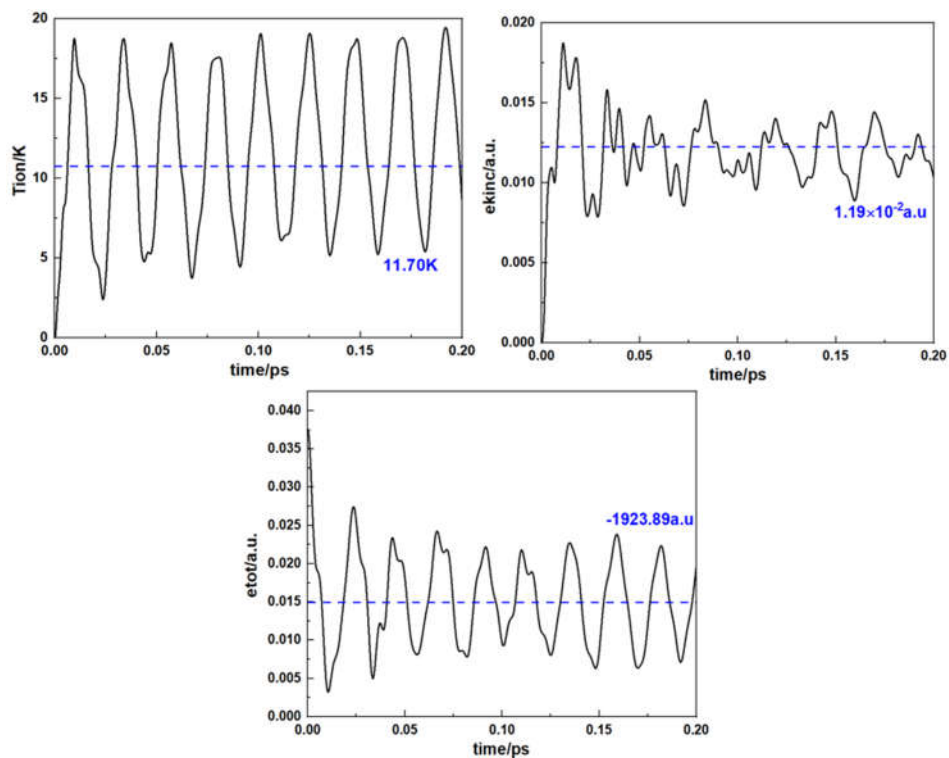

**Fig. S2.** The convergence curves of the temperature of ions ( $T_{ions}$ ), kinetic energies of virtual electrons ( $e_{kinc}$ ) and the total electronic energies ( $e_{tot}$ ) of FeCP

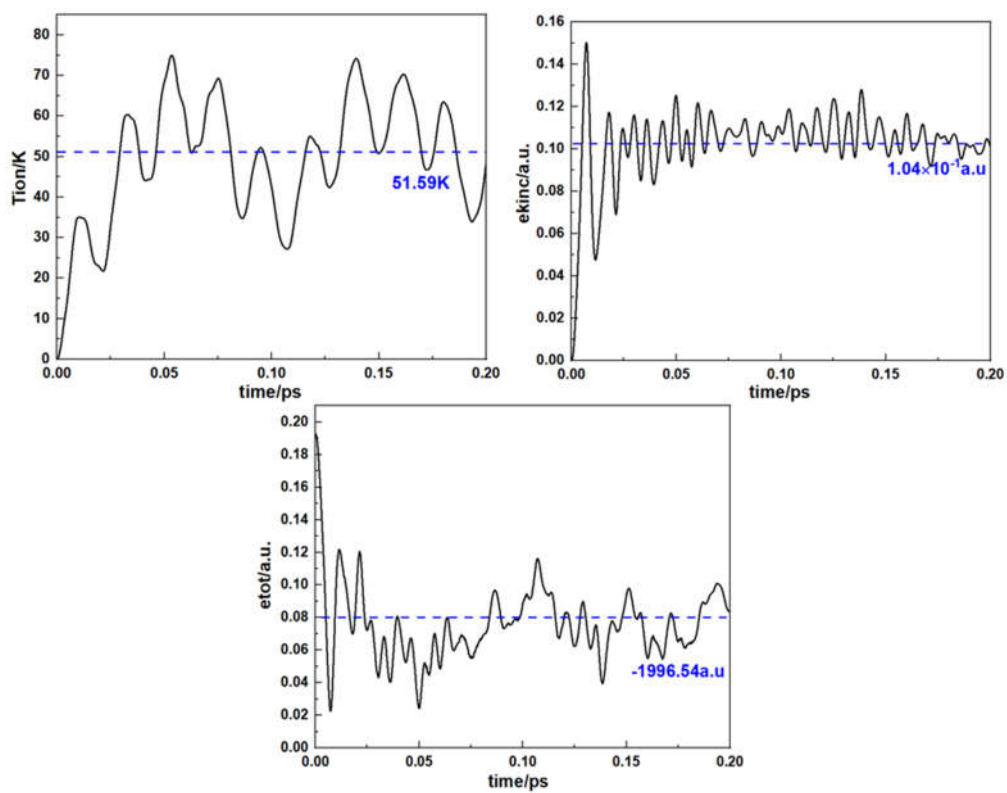

**Fig. S3.** The convergence curves of the temperature of ions ( $T_{ions}$ ), kinetic energies of virtual electrons ( $e_{kinc}$ ) and the total electronic energies ( $e_{tot}$ ) of CoCP

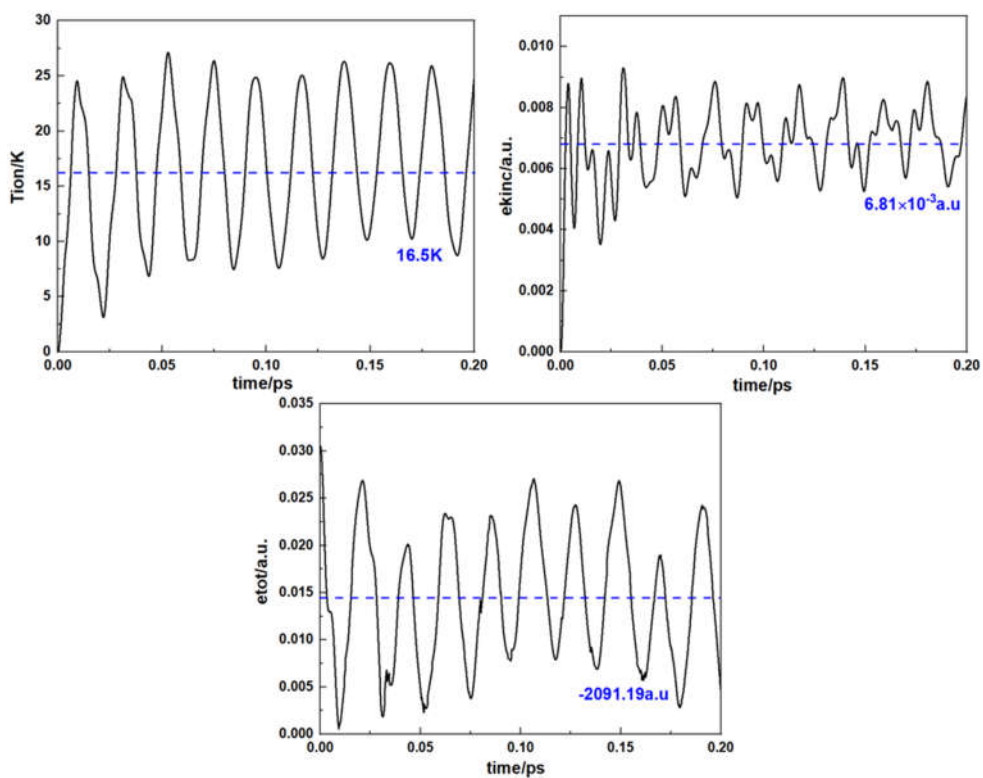

**Fig. S4.** The convergence curves of the temperature of ions ( $T_{ions}$ ), kinetic energies of virtual electrons ( $e_{kinc}$ ) and the total electronic energies ( $e_{tot}$ ) of NiCP

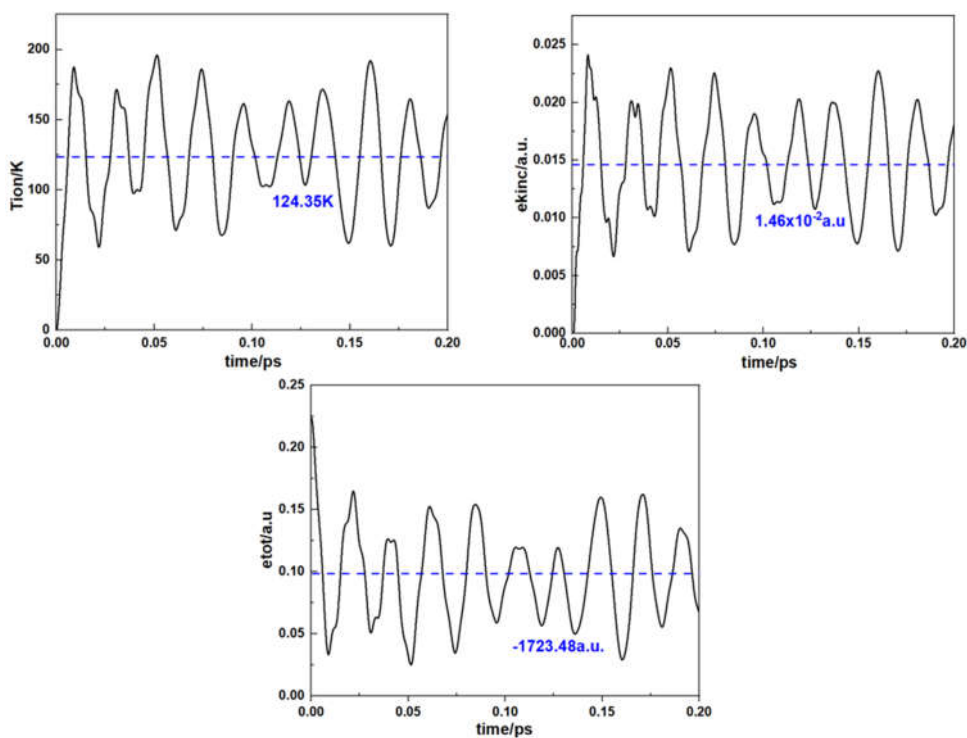

**Fig. S5.** The convergence curves of the temperature of ions ( $T_{ions}$ ), kinetic energies of virtual electrons ( $e_{kinc}$ ) and the total electronic energies ( $e_{tot}$ ) of FeCP

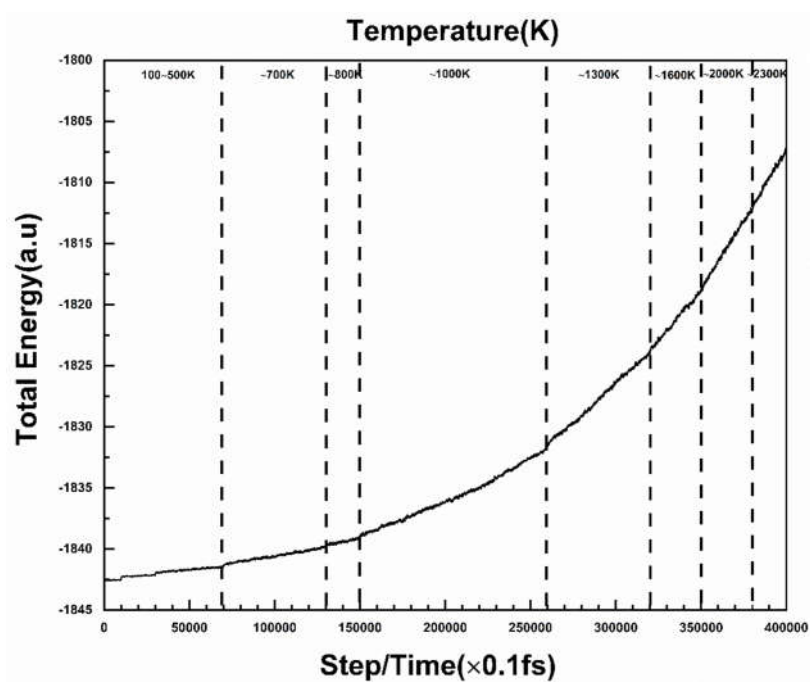

Fig. S6. The relationship between the total energy and the simulation time/temperature of MnCP

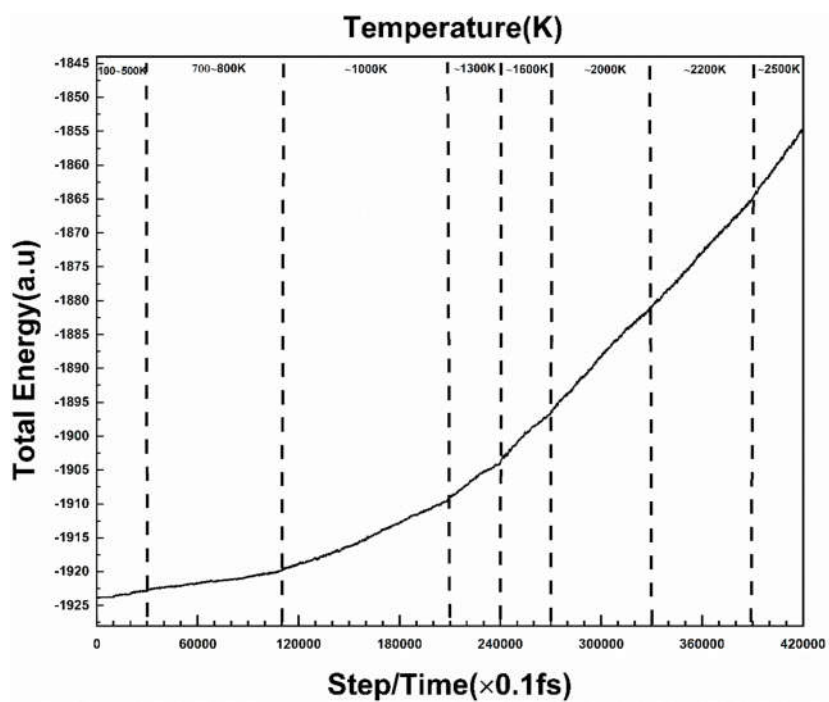

Fig. S7. The relationship between the total energy and the simulation time/temperature of FeCP

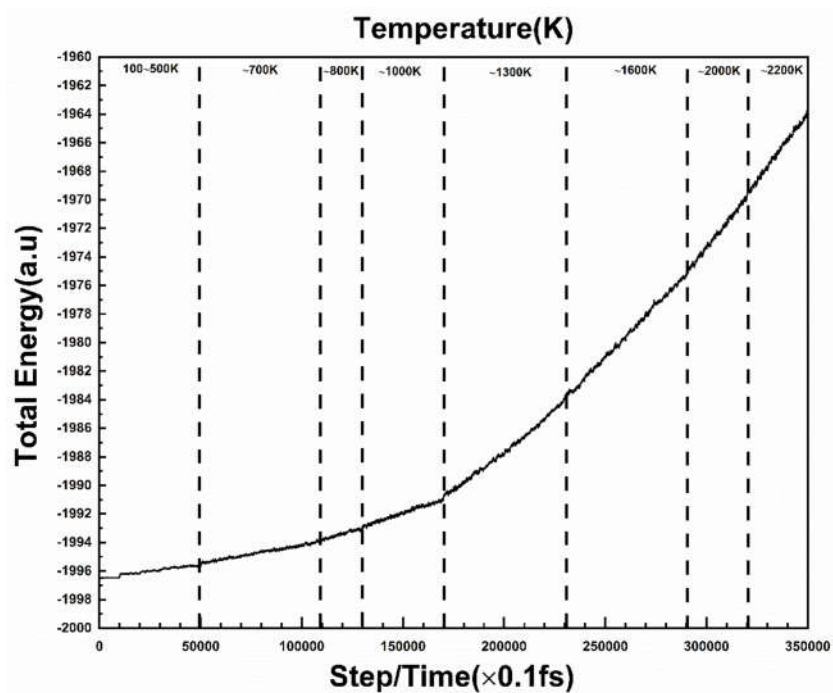

Fig. S8. The relationship between the total energy and the simulation time/temperature of CoCP

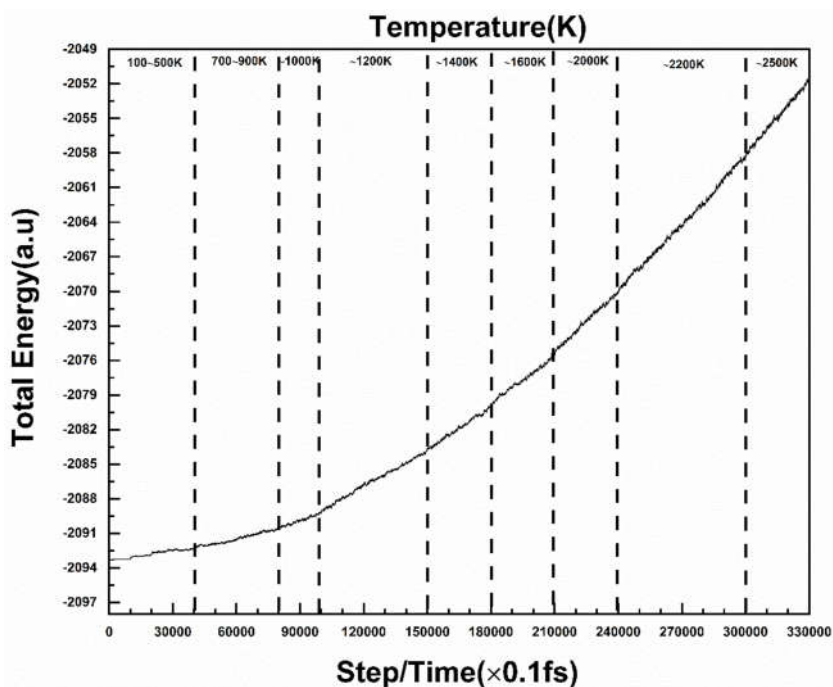

Fig. S9. The relationship between the total energy and the simulation time/temperature of NiCP

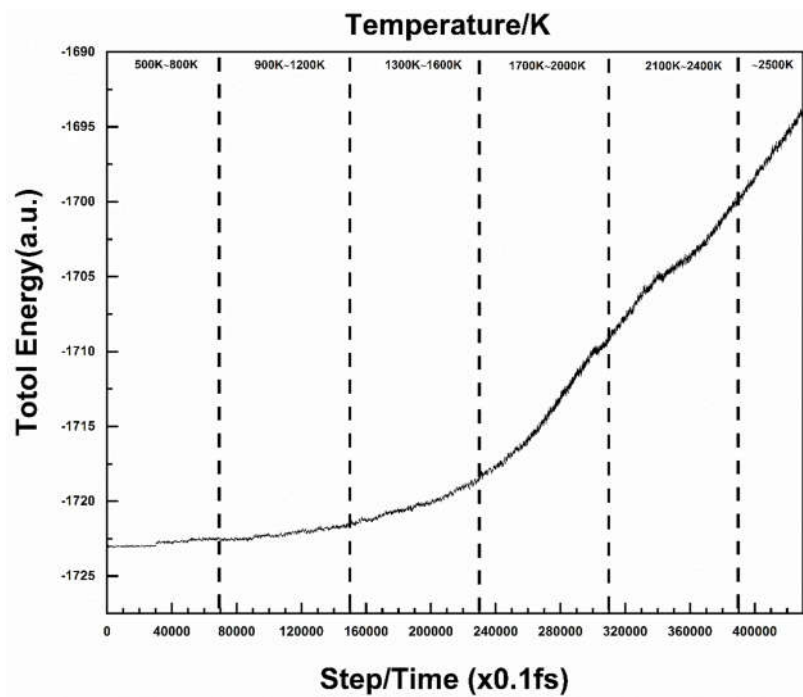

**Fig. S10.** The relationship between the total energy and the simulation time/temperature of CdCP



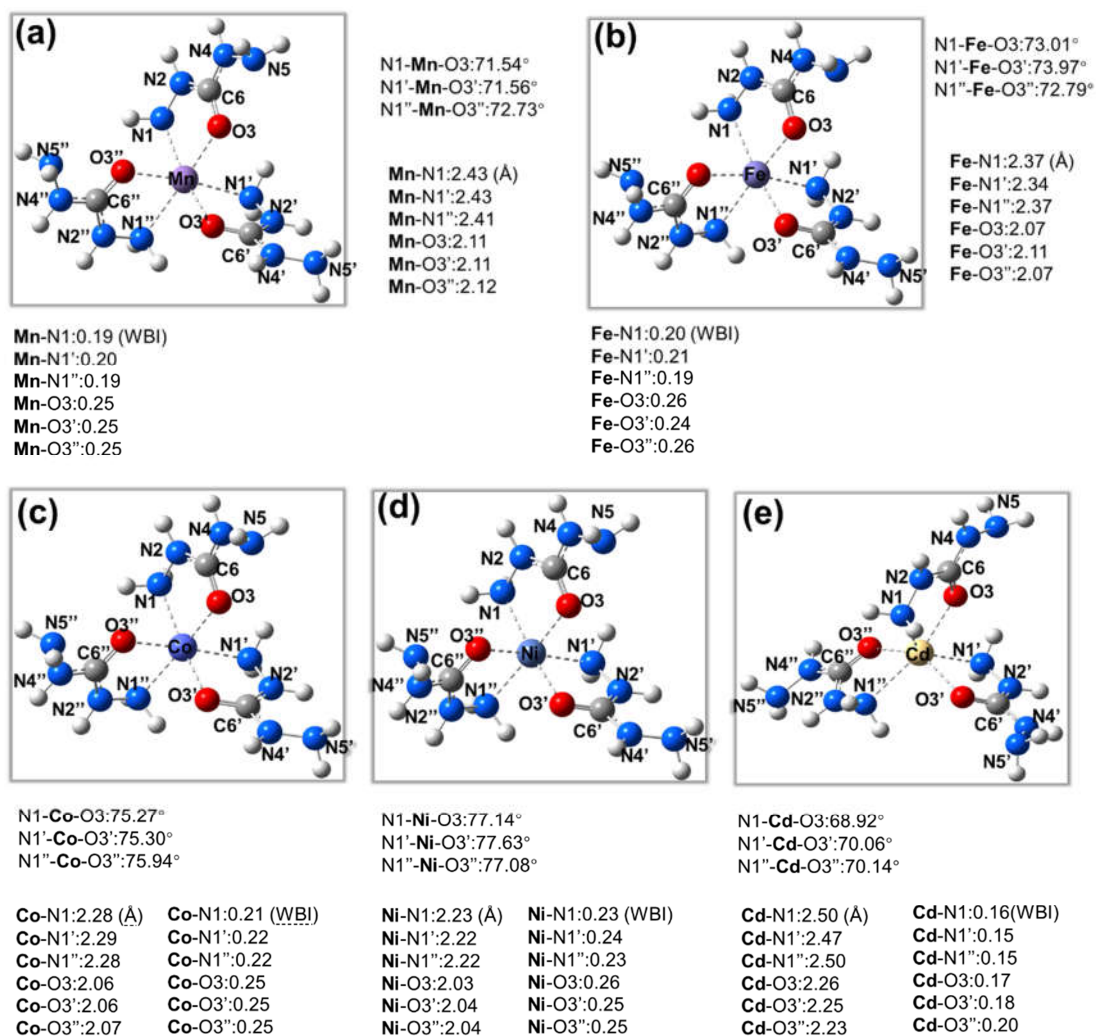

**Fig. S11** The molecular structures, parameters and Wiberg bond index of coordinative bonds (WBI) of (a)-(e)  $[M(CHZ)_2]^{2+}$  ( $M^{2+} = Mn^{2+}, Fe^{2+}, Co^{2+}, Ni^{2+}, Zn^{2+}$  and  $Cd^{2+}$ ) under the level of m062x/def2tzvp

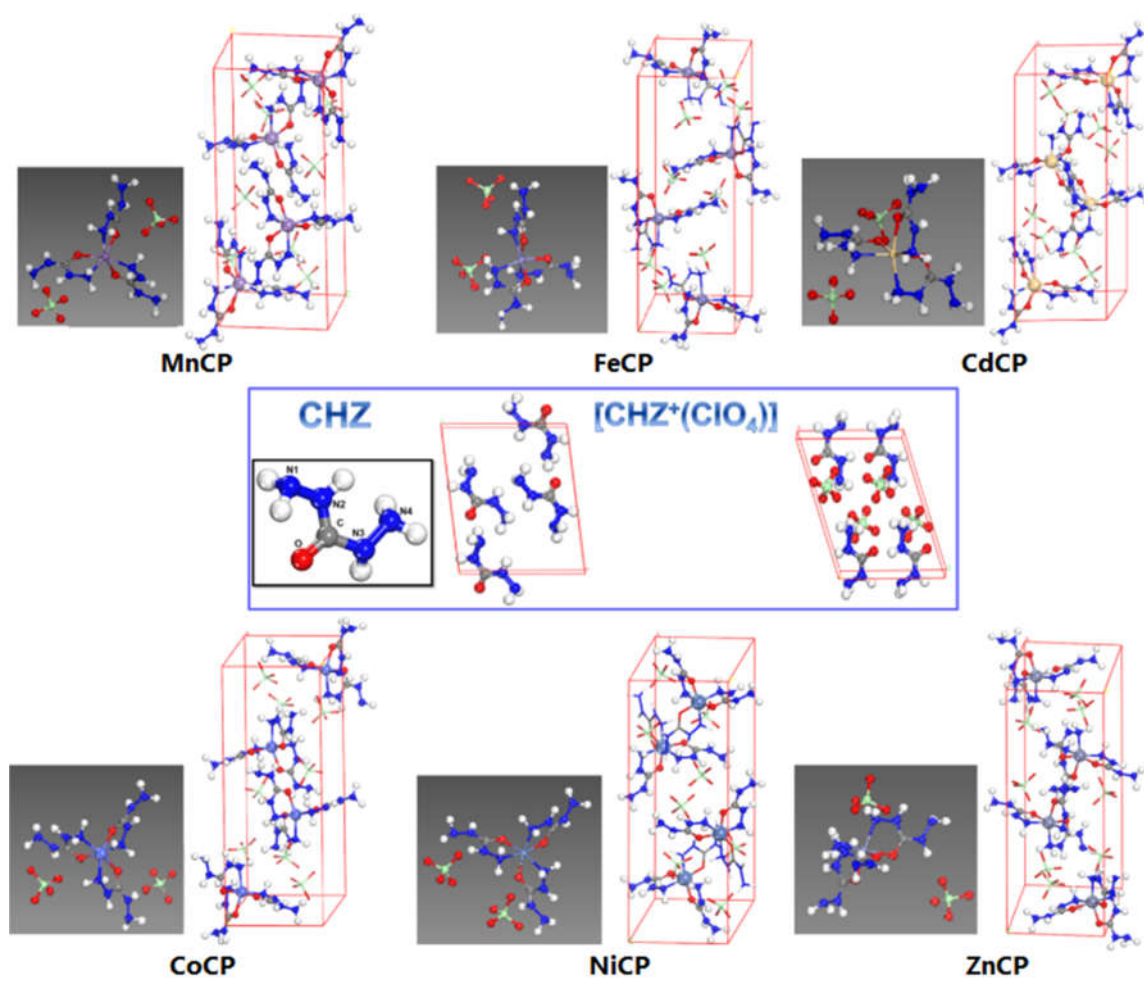

**Fig. S12** The optimized crystal structures of CHZ, [CHZ<sup>2+</sup>(ClO<sub>4</sub><sup>-</sup>)<sub>2</sub>] and six MCPs ( $M^{2+} = Mn^{2+}, Fe^{2+}, Co^{2+}, Ni^{2+},$  and  $Cd^{2+}$ )

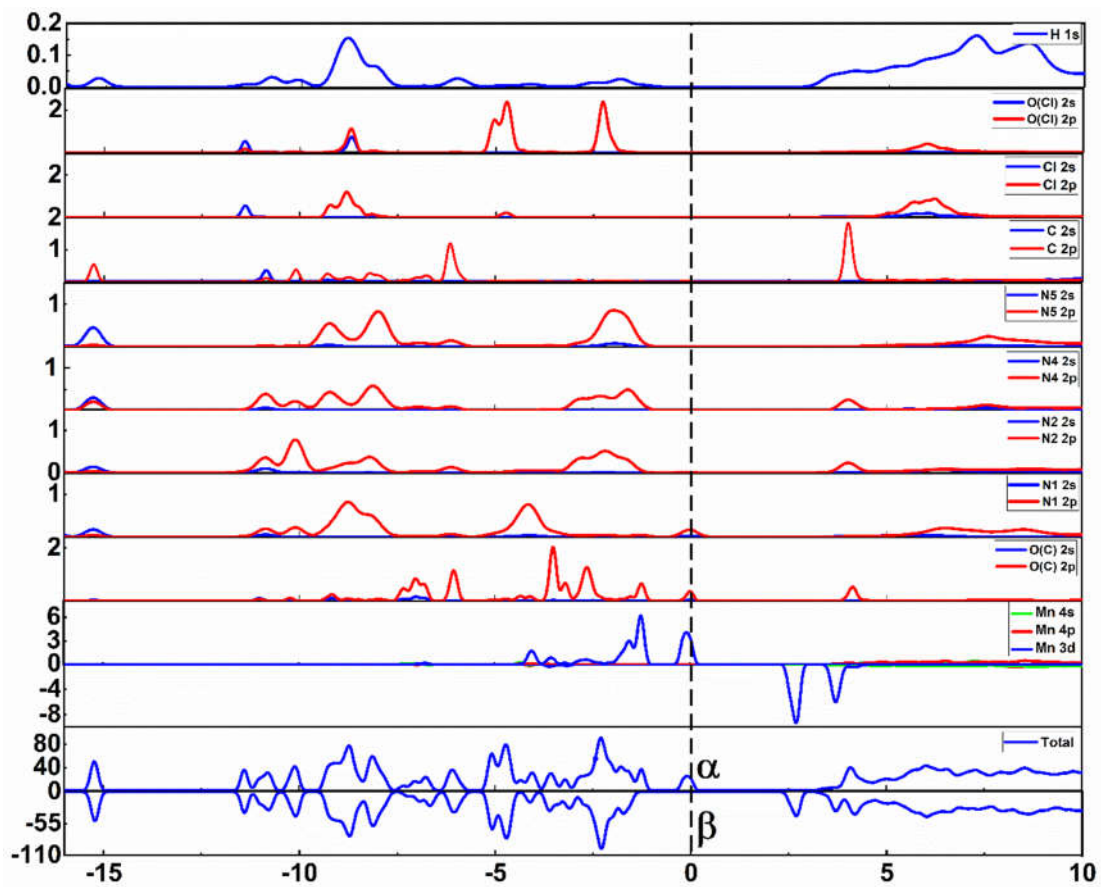

**Fig. S13.** The density of states (DOS) and partial density of states (pDOS) of MnCP.

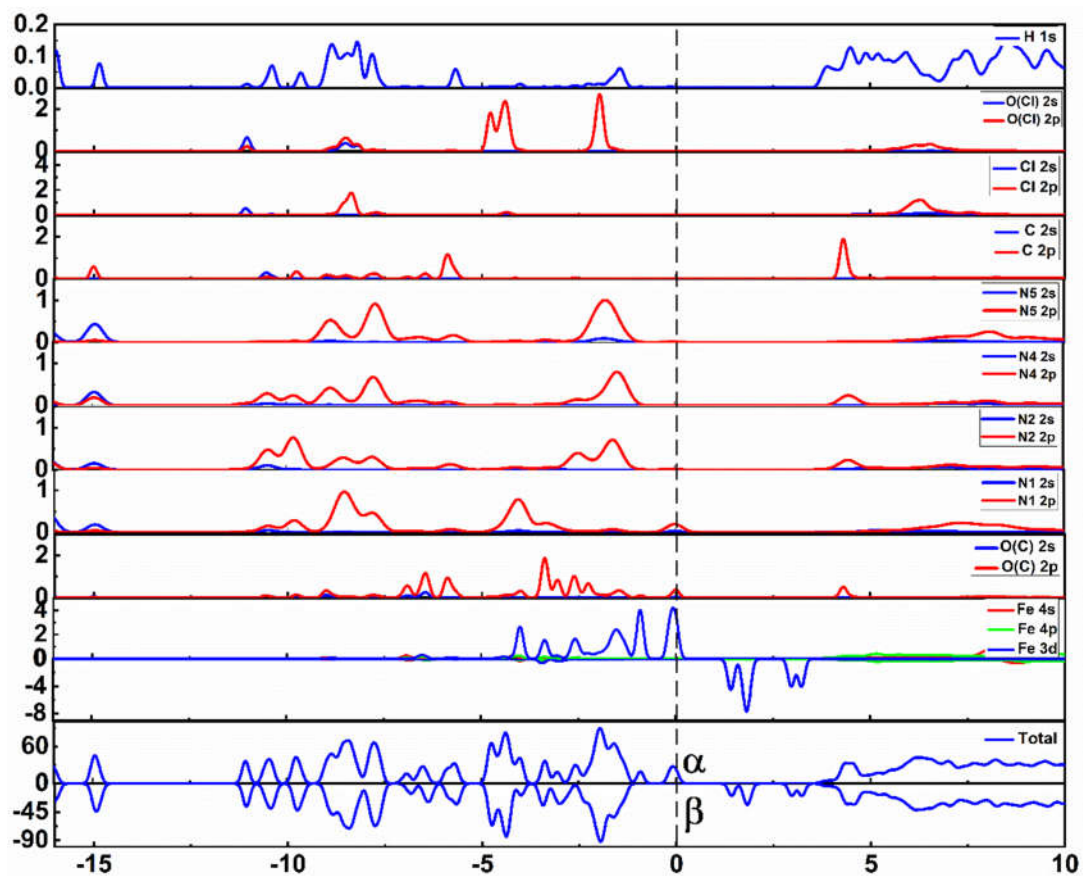

Fig. S14. The density of states (DOS) and partial density of states (pDOS) of FeCP.

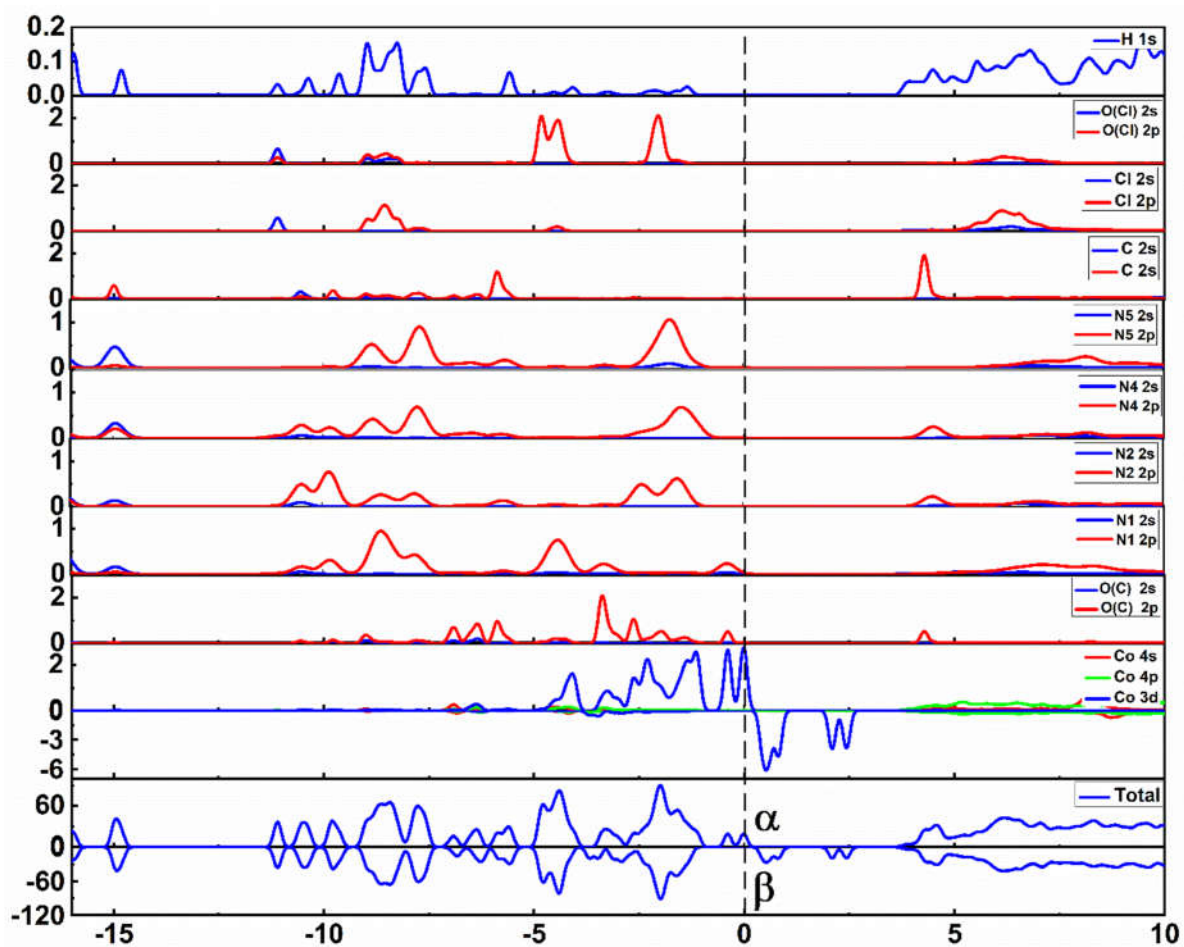

Fig. S15. The density of states (DOS) and partial density of states (pDOS) of CoCP.

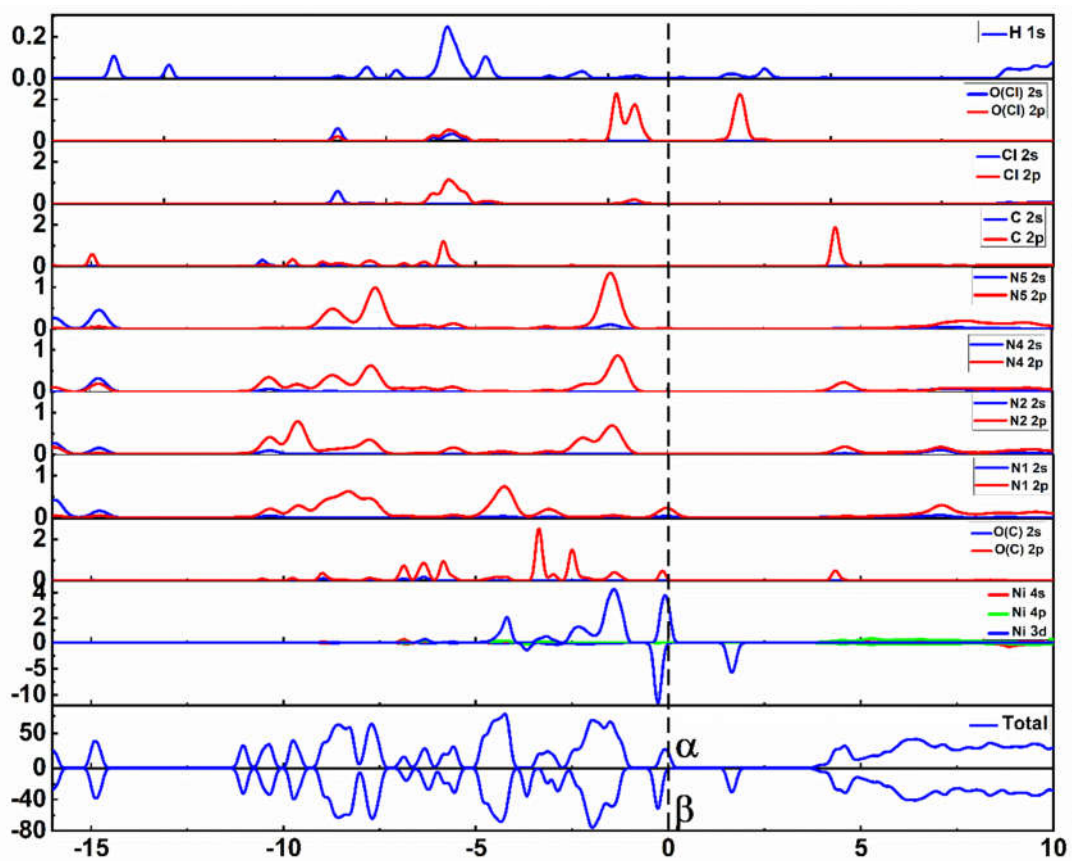

Fig. S16. The density of states (DOS) and partial density of states (pDOS) of NiCP.



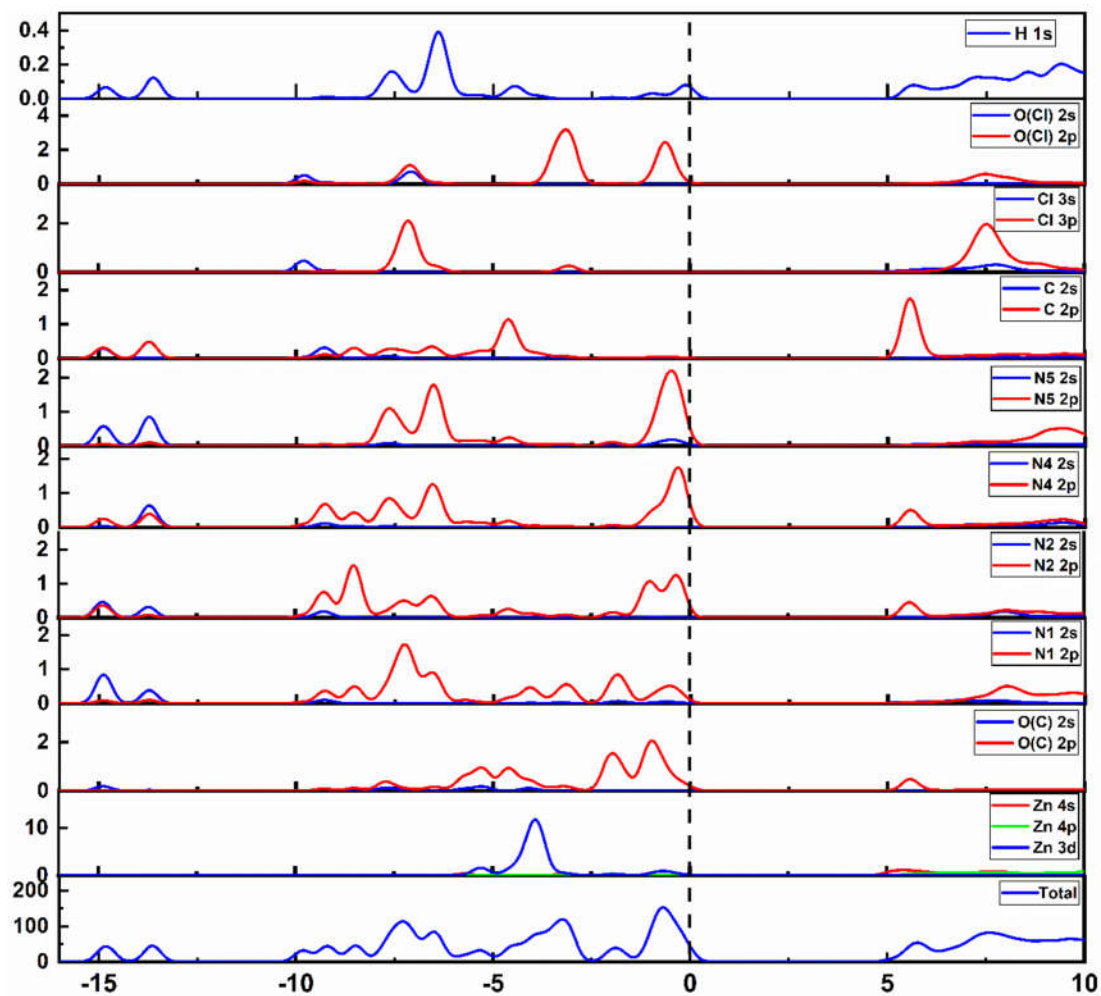

**Fig. S17.** The density of states (DOS) and partial density of states (pDOS) of ZnCP.

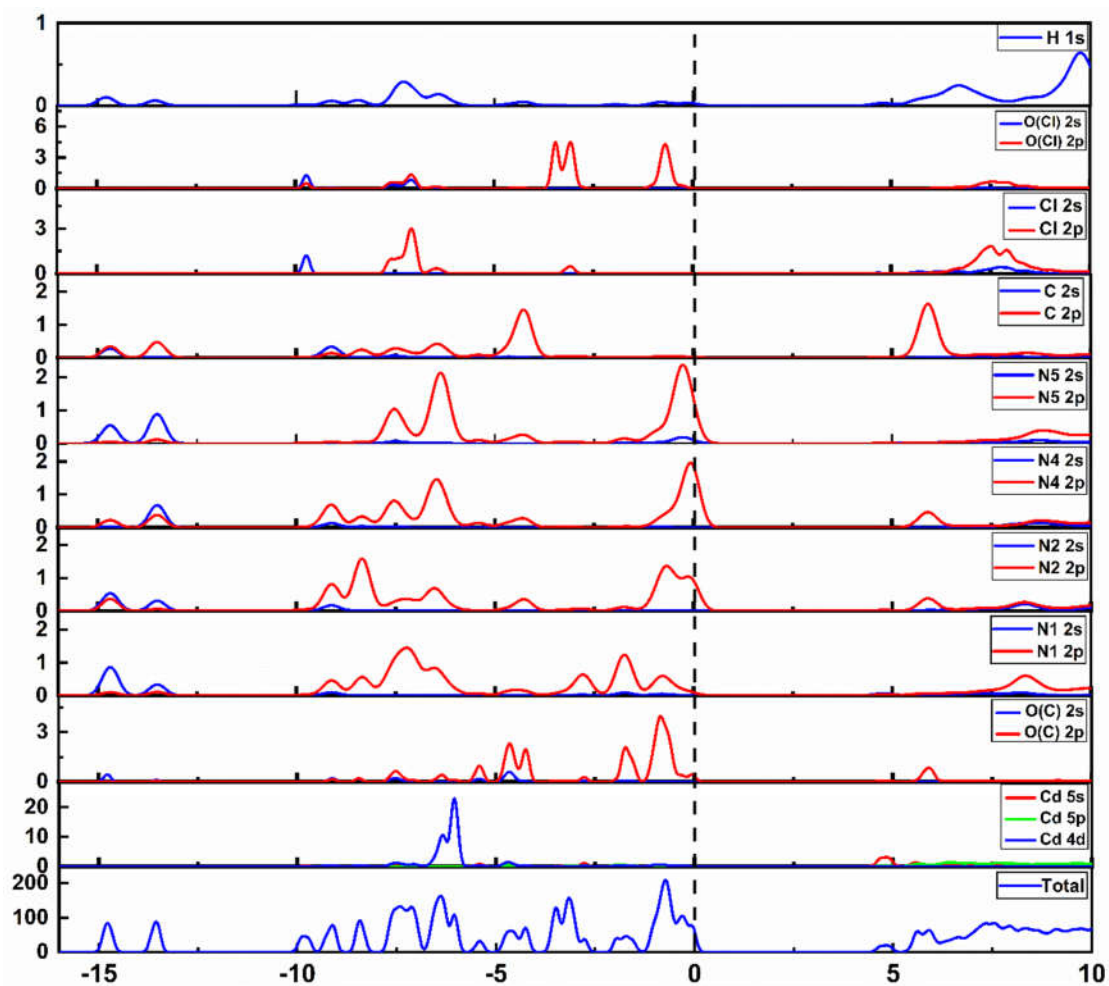

**Fig. S18.** The density of states (DOS) and partial density of states (pDOS) of CdCP.



### The intermolecular interactions among CHZ, $M^{2+}$ and $ClO_4^-$

In order to understand intermolecular interactions among CHZ,  $M^{2+}$  and  $ClO_4^-$ , we compare the individual molecular CHZ and the ligand CHZ of MCPs (CHZ(M)) in Fig. S9. In the Hirshfeld surfaces of Fig. 2(a), the red dots represent the distance between molecules is less than the van der Waals distance and therefore suggest the presence of strong intermolecular interactions. In the individual molecular CHZ, most of the red dots located along the surface edges of the plate-like Hirshfeld surface are related to the intermolecular  $H\cdots H$  interactions with the percentage of 50.7%, higher than  $N-H\cdots O$  (12.2%) and  $C=O\cdots H$  (14.9%) in Fig. 2(e). In CHZ(M), the intermolecular  $H\cdots H$  interactions decreased drastically, but with obviously increased  $O\cdots H$  interactions between CHZ and  $ClO_4^-$ .

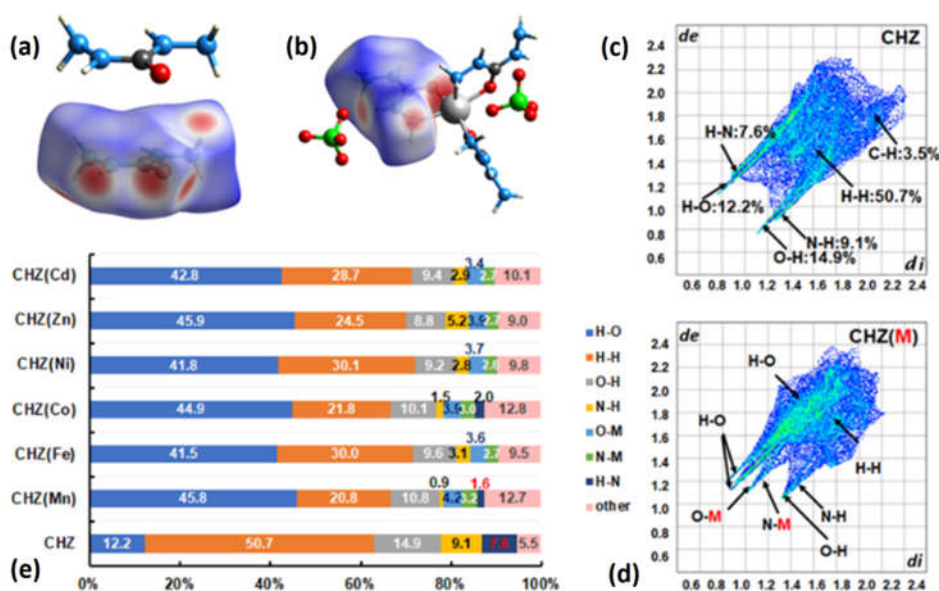

**Fig. S19** Molecular structure and Hirshfeld surfaces of individual molecular (a) CHZ and (b) CHZ(M); fingerprint plot of (c) CHZ and (d) CHZ(M); (e) populations of intermolecular interactions of CHZ and CHZ(M).

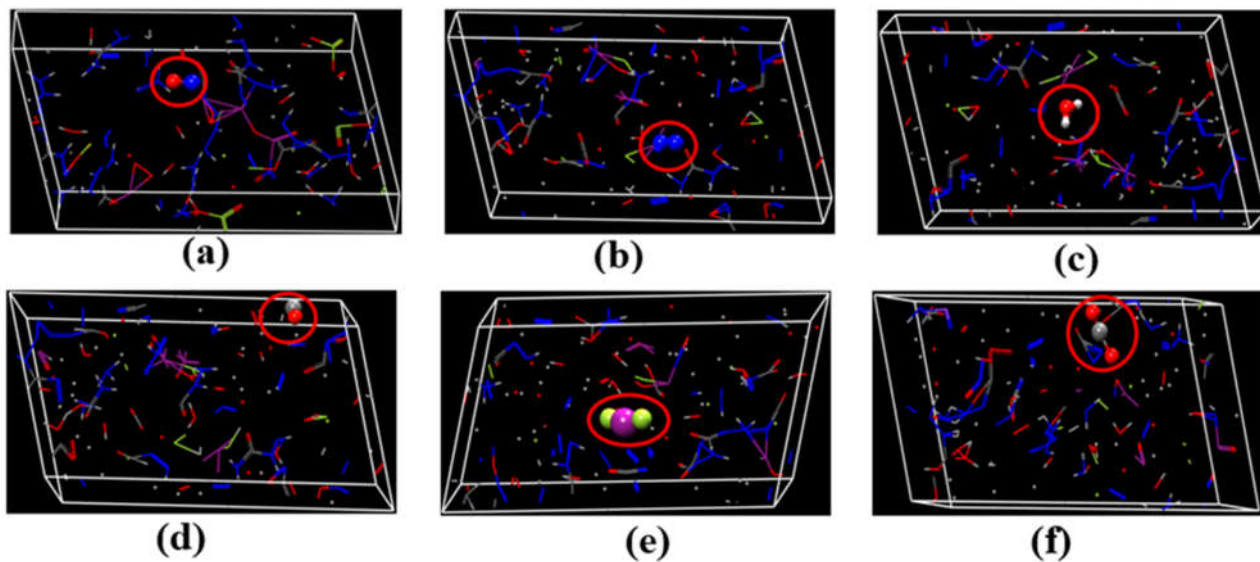

**Fig. S20.** The snapshots of the typical products of MnCP. (a) the formation of NO at 27.11 ps; (b) the formation of N<sub>2</sub> at 33.89 ps; (c) the formation of H<sub>2</sub>O at 34.46 ps; (d) the formation of CO at 34.84 ps. (e) the formation of MnCl<sub>2</sub> at 35.36 ps; (f) the formation of CO<sub>2</sub> at 39.46 ps.

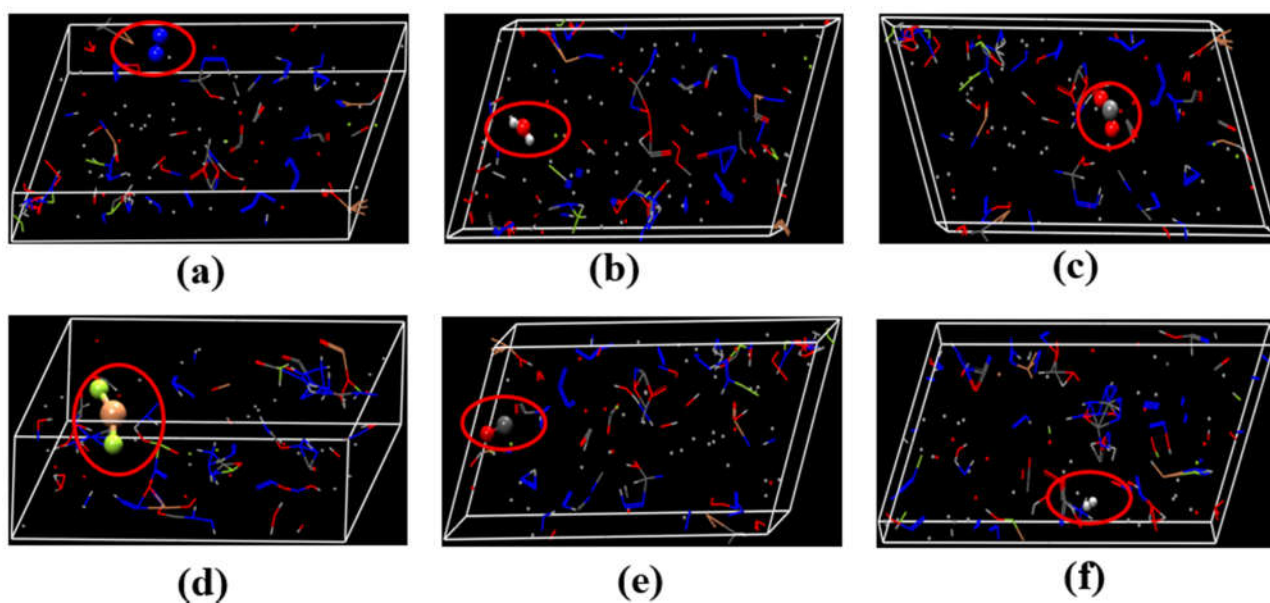

**Fig. S21.** The snapshots of the typical products of FeCP. (a) the formation of N<sub>2</sub> at 17.47 ps; (b) the formation of H<sub>2</sub>O at 23.99 ps; (c) the formation of CO<sub>2</sub> at 25.17 ps; (d) the formation of FeCl<sub>2</sub> at 26.88 ps. (e) the formation of H<sub>2</sub> at 27.11 ps; (f) the formation of H<sub>2</sub> at 27.11 ps.

CO at 34.57 ps; (f) the formation of H<sub>2</sub> at 38.08 ps.

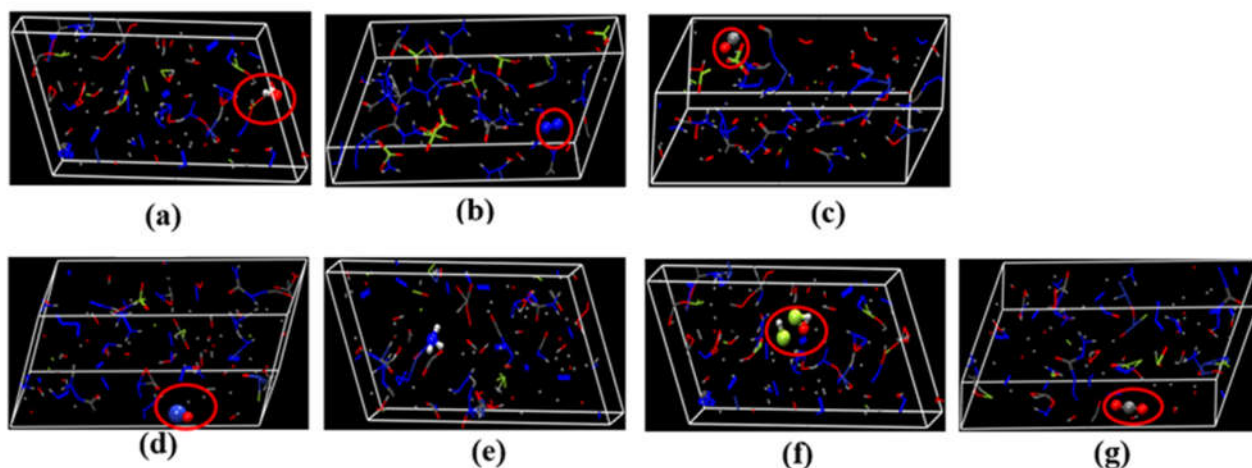

**Fig. S22.** The snapshots of the typical products of CoCP. (a) the formation of H<sub>2</sub>O at 17.62 ps; (b) the formation of N<sub>2</sub> at 19.01 ps; (c) the formation of CO at 22.86 ps; (d) the formation of CoO at 25.49 ps; (e) the formation of NH<sub>3</sub> at 27.41 ps; (f) the formation of HCl and HClO at 28.00 ps; (g) the formation of CO<sub>2</sub> at 32.79 ps.

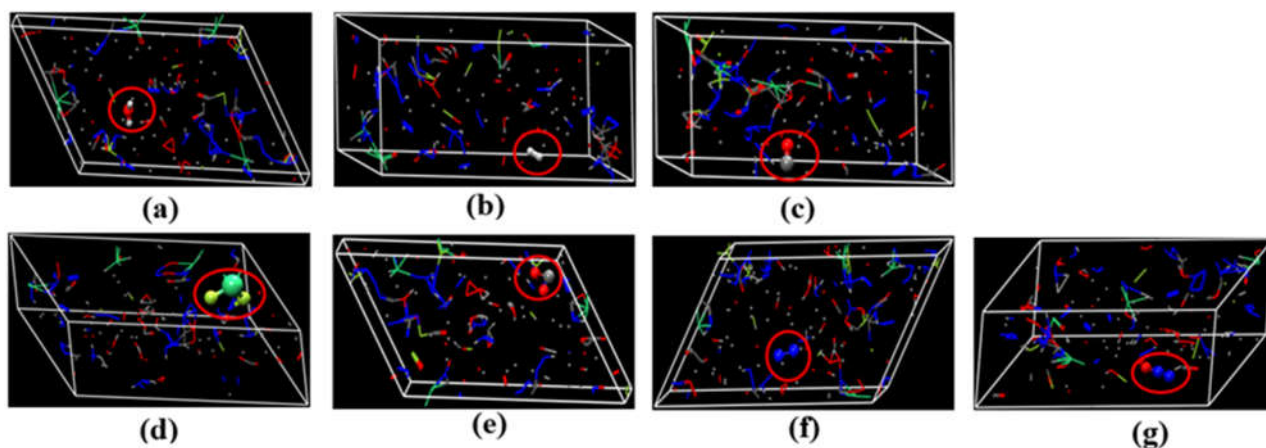

**Fig. S23.** The snapshots of the typical products of NiCP. (a) the formation of H<sub>2</sub>O at 16.05 ps; (b) the formation of H<sub>2</sub> at 20.08 ps; (c) the formation of CO at 24.08 ps; (d) the formation of NiCl<sub>2</sub> at 25.40 ps; (e) the formation of CO<sub>2</sub> at 25.81 ps; (f) the formation of N<sub>2</sub> at 25.81 ps; (g) the formation of N<sub>2</sub>O at 26.31 ps.

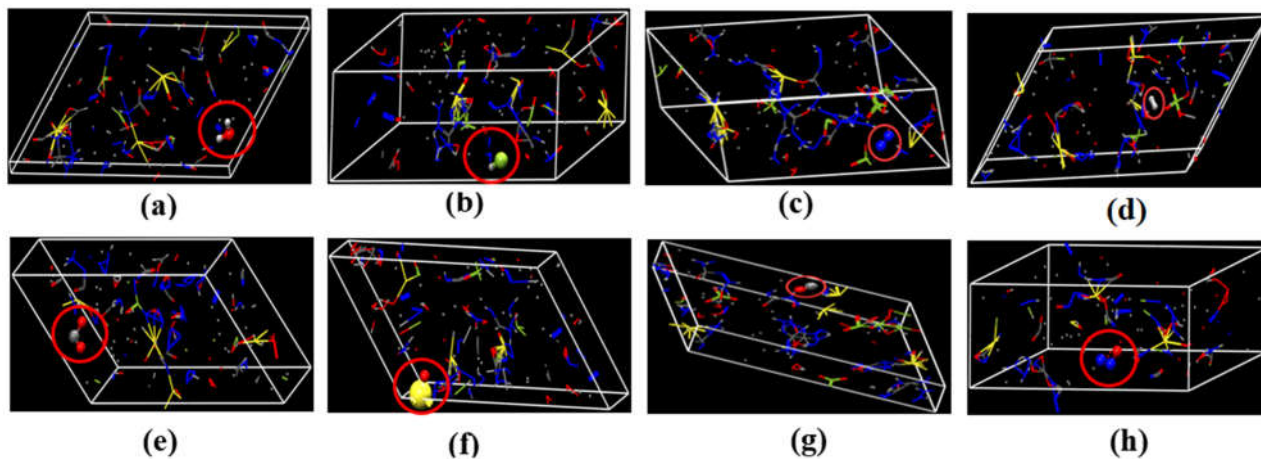

**Fig. S24.** The snapshots of the typical products of CdCP. (a) the formation of H<sub>2</sub>O at 26.30 ps; (b) the formation of HCl at 26.86 ps; (c) the formation of N<sub>2</sub> at 27.55 ps; (d) the formation of H<sub>2</sub> at 27.55 ps; (e) the formation of CO<sub>2</sub> at 27.55 ps; (f) the formation of CdO at 33.38 ps; (g) the formation of CO at 33.83 ps; (h) the formation of N<sub>2</sub>O at 36.76 ps.

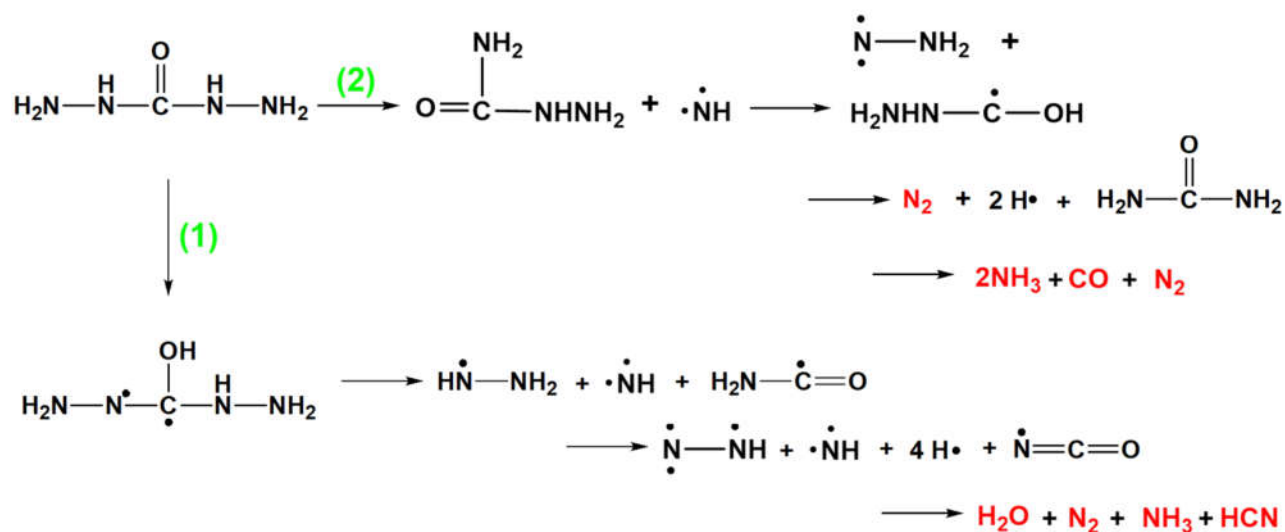

**Scheme S1.** The decomposition pathways of CHZ

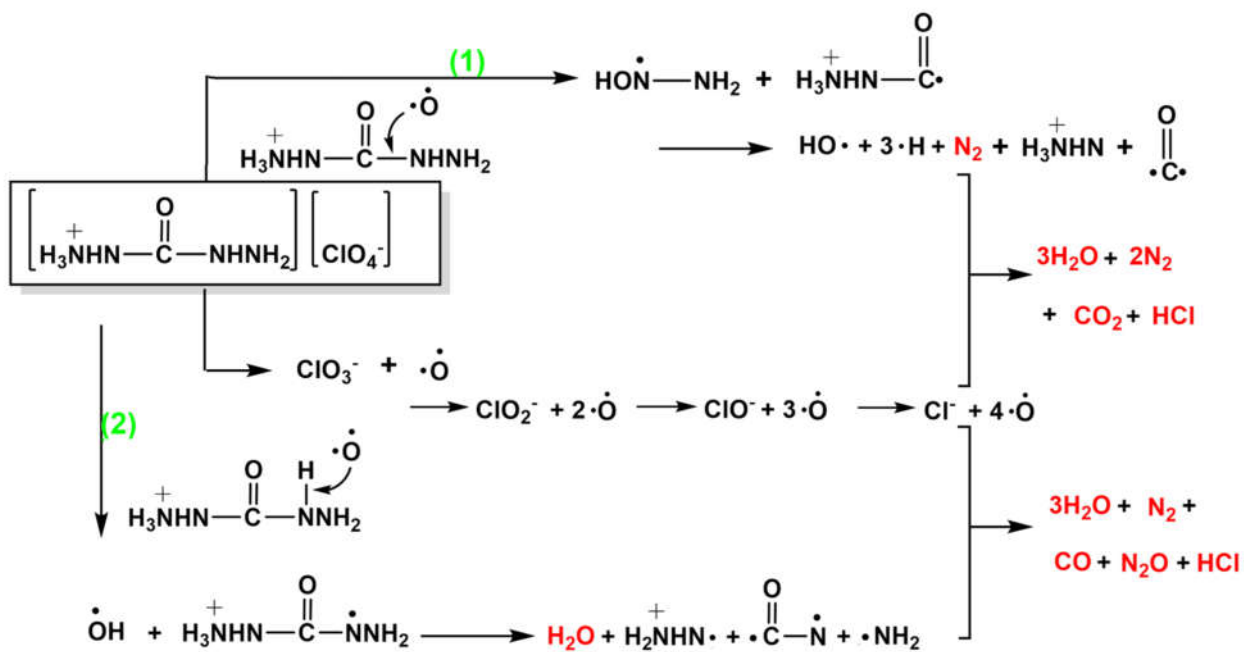

Scheme S2. The decomposition pathways of CHZCP



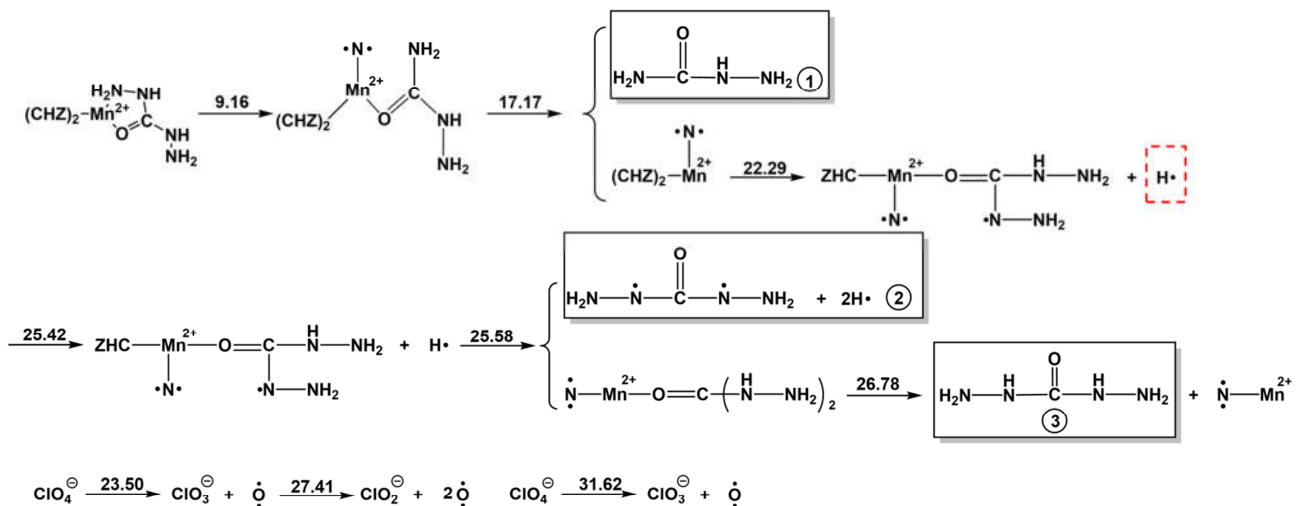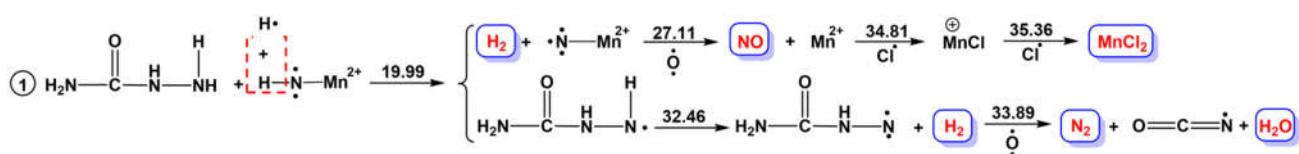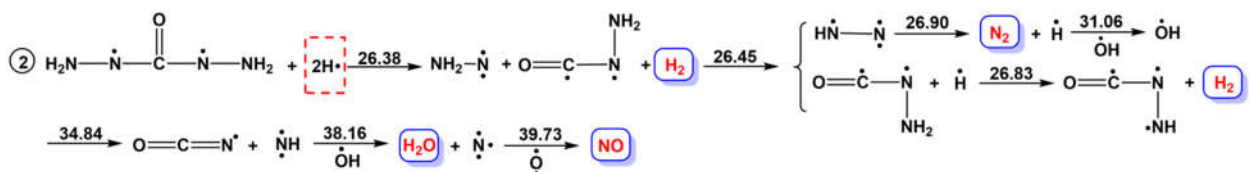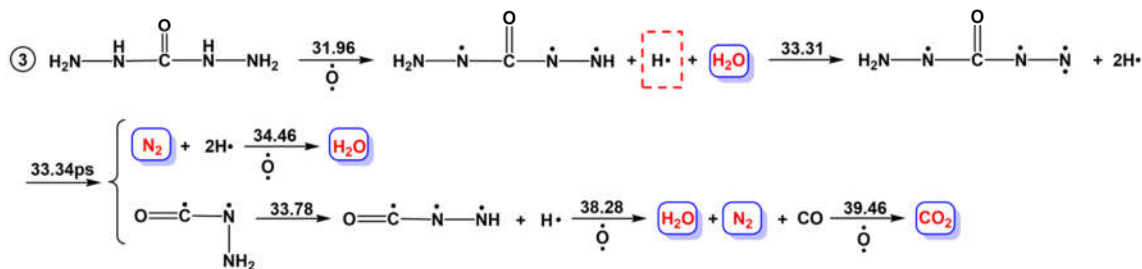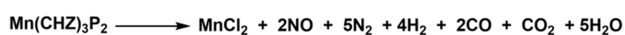

Scheme S3. The decomposition pathways of MnCP

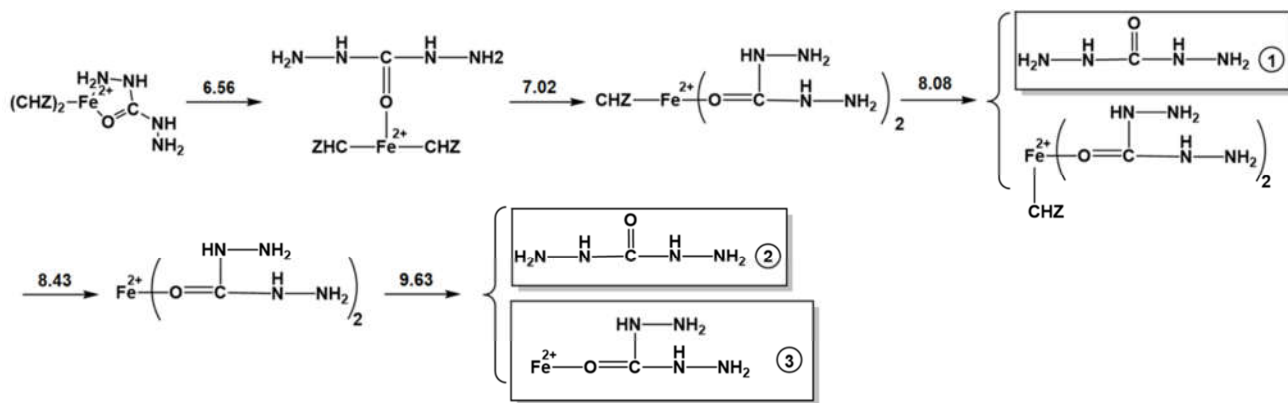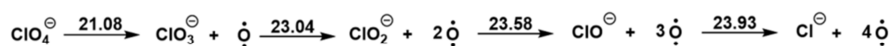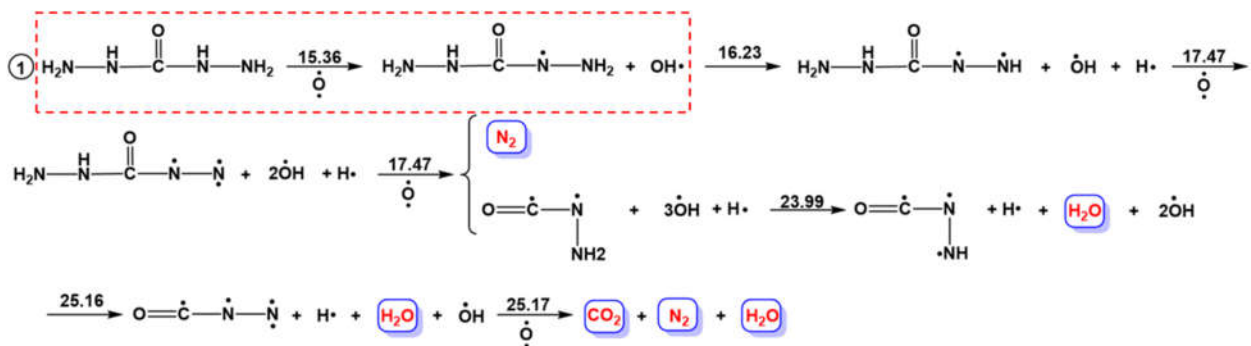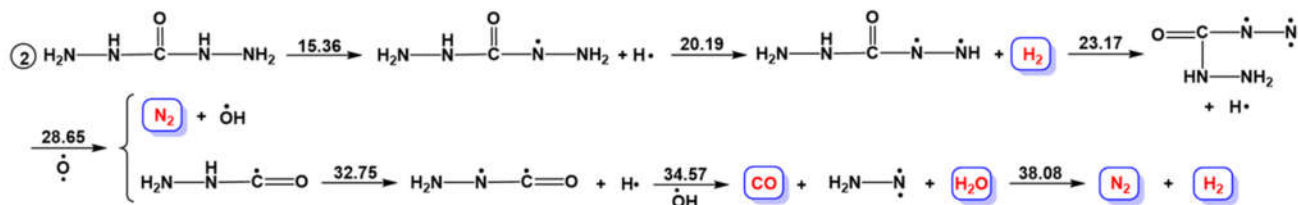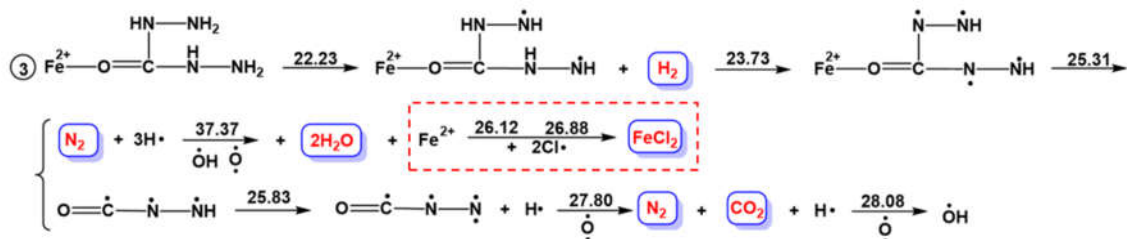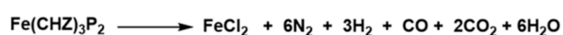

Scheme S4. The decomposition pathways of FeCP

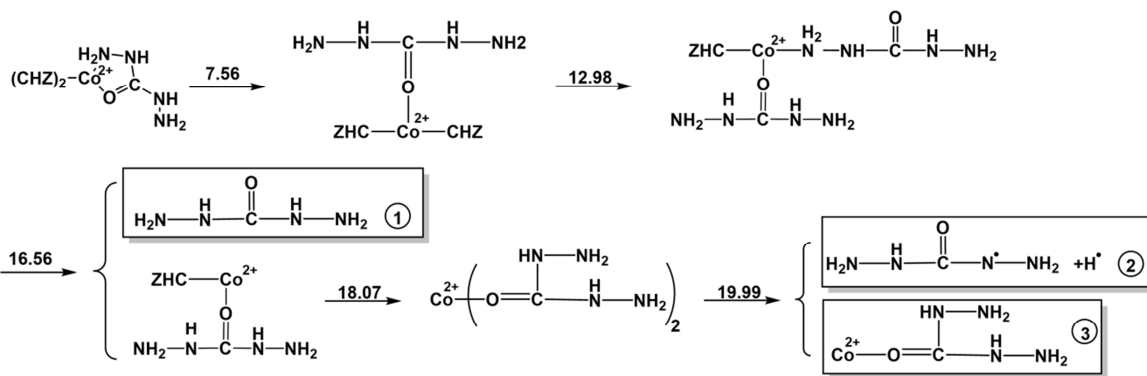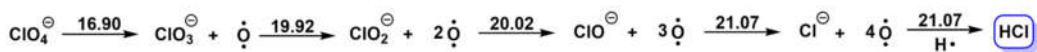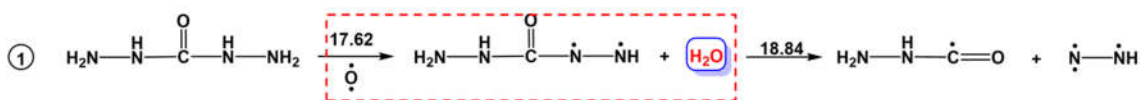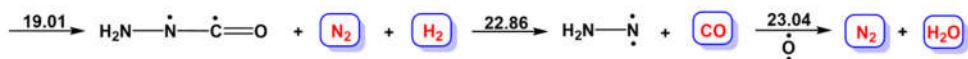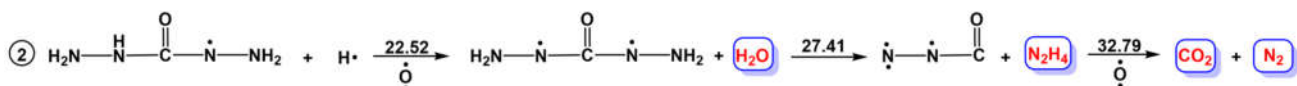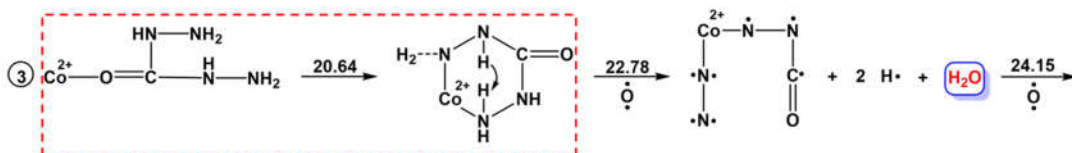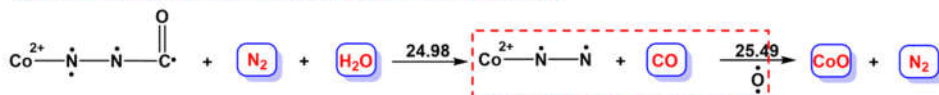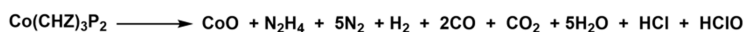

Scheme S5. The decomposition pathways of CoCP



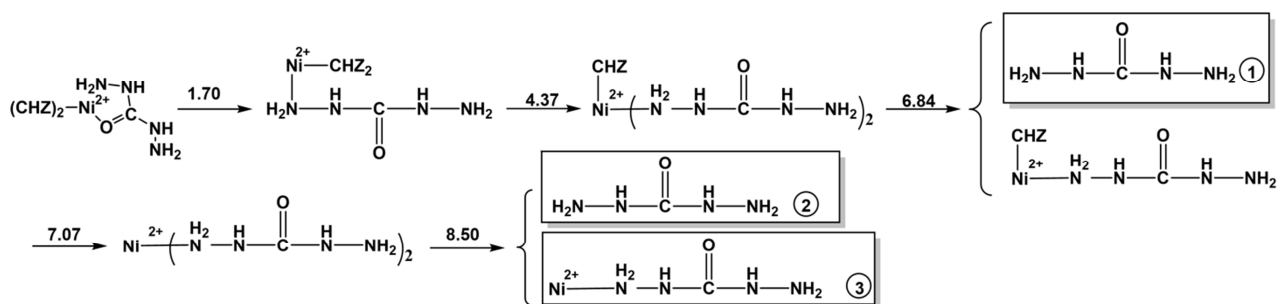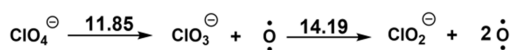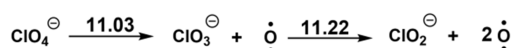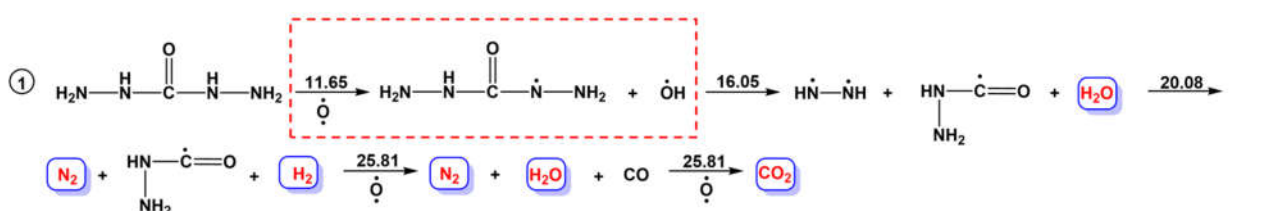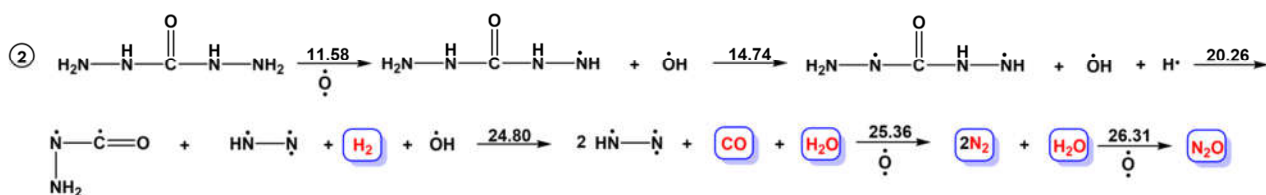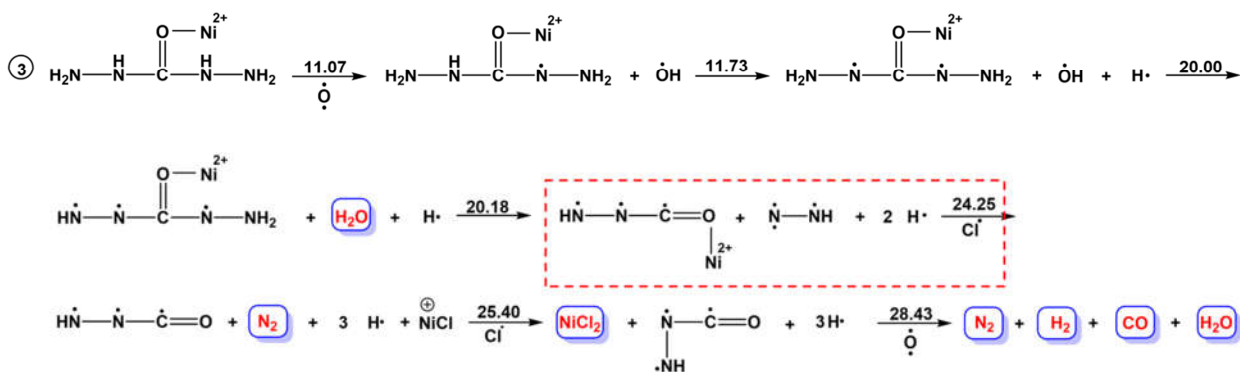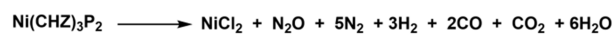

Scheme S6. The decomposition pathways of NiCP



**Table S1~Table S5.** The Cartesian coordinates of  $[M(\text{CHZ})_2]^{2+}$  ( $M^{2+} = \text{Mn}^{2+}, \text{Fe}^{2+}, \text{Co}^{2+}, \text{Ni}^{2+}$  and  $\text{Cd}^{2+}$ ) of the optimized structure under the level of m062x/def2tzvp.

**Table S1.** The Cartesian coordinates of  $[\text{Mn}(\text{CHZ})_2]^{2+}$  of the optimized structure under the level of m062x/def2tzvp.

| Atom | x         | y         | z         |
|------|-----------|-----------|-----------|
| O    | 1.007455  | -1.530340 | 0.557955  |
| N    | 2.004472  | -0.321340 | -1.633428 |
| N    | 2.809018  | -1.036015 | -0.739827 |
| N    | 3.054265  | -2.213680 | 1.210195  |
| N    | 4.424325  | -2.245236 | 0.970367  |
| C    | 2.237923  | -1.585012 | 0.357070  |
| H    | 3.815935  | -1.062590 | -0.836487 |
| H    | 2.317461  | 0.647278  | -1.660463 |
| H    | 2.105967  | -0.715901 | -2.564639 |
| H    | 2.637755  | -2.606677 | 2.044110  |
| H    | 4.748483  | -3.202133 | 0.885460  |
| H    | 4.926897  | -1.780906 | 1.718734  |
| N    | -1.237270 | -2.121181 | -1.339918 |
| O    | -2.063883 | -0.194272 | 0.310746  |
| N    | -1.156433 | 1.774610  | -1.663180 |
| O    | 0.751077  | 1.661497  | 0.198764  |
| C    | -2.753035 | -1.222267 | 0.254756  |
| C    | 0.264678  | 2.774019  | -0.042627 |
| N    | 0.624212  | 3.894528  | 0.596765  |
| N    | 1.584914  | 3.836910  | 1.597271  |
| N    | -3.865680 | -1.407322 | 0.976890  |
| N    | -4.289851 | -0.415245 | 1.850711  |
| N    | -0.673609 | 2.925394  | -1.029444 |
| N    | -2.412123 | -2.241280 | -0.591389 |
| H    | -1.201271 | 3.780859  | -1.123054 |
| H    | -2.127548 | 1.614361  | -1.400683 |
| H    | -1.104068 | 1.902131  | -2.669461 |
| H    | 0.201834  | 4.777656  | 0.342187  |
| H    | 1.185364  | 4.109513  | 2.486943  |
| H    | 2.368438  | 4.435232  | 1.367074  |
| H    | -1.449220 | -2.257704 | -2.324174 |
| H    | -0.567168 | -2.829347 | -1.046228 |
| H    | -2.891943 | -3.128905 | -0.577636 |
| H    | -4.391758 | -2.266047 | 0.882142  |
| H    | -4.262755 | -0.749718 | 2.806215  |
| H    | -5.226555 | -0.114311 | 1.611998  |
| Mn   | -0.128165 | -0.114372 | -0.533282 |

**Table S2.** The Cartesian coordinates of  $[\text{Fe}(\text{CHZ})_2]^{2+}$  of the optimized structure under the level of m062x/def2tzvp.

| Atom | x         | y         | z         |
|------|-----------|-----------|-----------|
| O    | 0.726109  | -1.535697 | 0.590975  |
| N    | 1.825407  | -0.549930 | -1.647181 |
| N    | 2.533472  | -1.387968 | -0.779009 |
| N    | 2.654467  | -2.531034 | 1.204801  |
| N    | 3.993853  | -2.785566 | 0.926855  |
| C    | 1.920270  | -1.800222 | 0.357364  |
| H    | 3.523591  | -1.558981 | -0.897284 |
| H    | 2.292485  | 0.353786  | -1.695001 |
| H    | 1.823125  | -0.956529 | -2.578694 |
| H    | 2.210765  | -2.826418 | 2.064518  |
| H    | 4.160071  | -3.783479 | 0.860368  |
| H    | 4.587734  | -2.389390 | 1.646967  |
| N    | -1.397767 | -1.876477 | -1.395802 |
| O    | -2.056730 | 0.045813  | 0.299566  |
| N    | -0.990043 | 1.976230  | -1.536298 |
| O    | 0.987704  | 1.527627  | 0.169167  |
| C    | -2.813603 | -0.935325 | 0.252628  |
| C    | 0.656540  | 2.710660  | -0.002029 |
| N    | 1.229913  | 3.737972  | 0.635261  |
| N    | 2.244101  | 3.498927  | 1.553117  |
| N    | -3.921159 | -1.051631 | 0.994173  |
| N    | -4.261245 | -0.039822 | 1.882330  |
| N    | -0.324192 | 3.028558  | -0.899798 |
| N    | -2.544774 | -1.965247 | -0.602853 |
| H    | -0.717314 | 3.956542  | -0.953613 |
| H    | -1.961425 | 1.942840  | -1.231594 |
| H    | -0.962202 | 2.119098  | -2.541499 |
| H    | 0.923388  | 4.682840  | 0.444030  |
| H    | 1.956530  | 3.788867  | 2.479942  |
| H    | 3.086759  | 3.988866  | 1.279341  |
| H    | -1.654726 | -1.929312 | -2.377746 |
| H    | -0.770260 | -2.646374 | -1.173669 |
| H    | -3.106585 | -2.802370 | -0.639270 |
| H    | -4.497163 | -1.879291 | 0.913707  |
| H    | -4.229235 | -0.379846 | 2.835793  |
| H    | -5.184091 | 0.317732  | 1.668994  |
| Fe   | -0.177369 | -0.020357 | -0.560765 |

**Table S3.** The Cartesian coordinates of  $[\text{Co}(\text{CHZ})_2]^{2+}$  of the optimized structure under the level of m062x/def2tzvp.

| Atom | x         | y         | z         |
|------|-----------|-----------|-----------|
| O    | -0.988265 | -1.461408 | -0.490433 |
| N    | -1.981160 | -0.120795 | 1.608705  |
| N    | -2.805650 | -0.777016 | 0.687400  |
| N    | -3.049645 | -1.949029 | -1.266972 |
| N    | -4.427870 | -1.841419 | -1.109466 |
| C    | -2.228653 | -1.392262 | -0.370841 |
| H    | -3.812966 | -0.687536 | 0.720858  |
| H    | -2.209172 | 0.871622  | 1.608445  |
| H    | -2.157134 | -0.492587 | 2.538600  |
| H    | -2.625810 | -2.395455 | -2.069695 |
| H    | -4.850051 | -2.760158 | -1.034099 |
| H    | -4.836611 | -1.341829 | -1.891499 |
| N    | 1.031149  | -2.076953 | 1.399415  |
| O    | 1.911756  | -0.238456 | -0.312514 |
| N    | 1.216527  | 1.554254  | 1.735458  |
| O    | -0.638513 | 1.606176  | -0.173760 |
| C    | 2.513709  | -1.319986 | -0.296259 |
| C    | -0.020047 | 2.658094  | 0.032994  |
| N    | -0.216385 | 3.784894  | -0.661984 |
| N    | -1.147676 | 3.802647  | -1.691615 |
| N    | 3.550223  | -1.605888 | -1.093918 |
| N    | 3.992726  | -0.659547 | -2.008540 |
| N    | 0.899524  | 2.733766  | 1.047564  |
| N    | 2.156149  | -2.297440 | 0.594829  |
| H    | 1.542493  | 3.508948  | 1.115217  |
| H    | 2.178551  | 1.288462  | 1.533067  |
| H    | 1.122092  | 1.718064  | 2.733950  |
| H    | 0.301831  | 4.620478  | -0.424615 |
| H    | -0.691314 | 3.988545  | -2.576280 |
| H    | -1.858479 | 4.500510  | -1.510533 |
| H    | 1.284820  | -2.217663 | 2.373513  |
| H    | 0.296431  | -2.736489 | 1.149680  |
| H    | 2.522716  | -3.235444 | 0.530114  |
| H    | 4.015667  | -2.500531 | -1.015570 |
| H    | 3.875123  | -1.000649 | -2.954766 |
| H    | 4.964249  | -0.432189 | -1.836725 |
| Co   | 0.094160  | -0.127926 | 0.664537  |

**Table S4.** The Cartesian coordinates of  $[\text{Ni}(\text{CHZ})_2]^{2+}$  of the optimized structure under the level of m062x/def2tzvp.

| Atom | x         | y         | z         |
|------|-----------|-----------|-----------|
| O    | 0.976511  | -1.397690 | 0.533537  |
| N    | 1.929271  | -0.114873 | -1.614058 |
| N    | 2.774131  | -0.734577 | -0.685360 |
| N    | 3.050548  | -1.840203 | 1.303787  |
| N    | 4.425656  | -1.720567 | 1.127820  |
| C    | 2.213854  | -1.321018 | 0.400033  |
| H    | 3.779640  | -0.633254 | -0.734020 |
| H    | 2.152885  | 0.877949  | -1.653525 |
| H    | 2.090040  | -0.516844 | -2.534232 |
| H    | 2.640563  | -2.260129 | 2.127806  |
| H    | 4.858699  | -2.636071 | 1.079277  |
| H    | 4.835890  | -1.190048 | 1.888489  |
| N    | -0.972367 | -2.022282 | -1.432660 |
| O    | -1.842274 | -0.251242 | 0.351791  |
| N    | -1.168128 | 1.460874  | -1.785983 |
| O    | 0.583707  | 1.574939  | 0.213978  |
| C    | -2.438186 | -1.333994 | 0.306651  |
| C    | -0.042124 | 2.611167  | -0.037258 |
| N    | 0.092463  | 3.749389  | 0.653304  |
| N    | 0.969036  | 3.798545  | 1.728821  |
| N    | -3.457584 | -1.657742 | 1.111379  |
| N    | -3.890734 | -0.748568 | 2.067184  |
| N    | -0.906325 | 2.658612  | -1.104492 |
| N    | -2.094744 | -2.275508 | -0.631830 |
| H    | -1.566390 | 3.414878  | -1.210546 |
| H    | -2.137216 | 1.186458  | -1.634188 |
| H    | -1.021144 | 1.607154  | -2.780945 |
| H    | -0.430383 | 4.570716  | 0.379141  |
| H    | 0.463919  | 3.979679  | 2.587548  |
| H    | 1.671760  | 4.511433  | 1.577476  |
| H    | -1.229531 | -2.130802 | -2.409979 |
| H    | -0.235319 | -2.689392 | -1.210330 |
| H    | -2.437476 | -3.223385 | -0.580196 |
| H    | -3.919537 | -2.551482 | 1.006323  |
| H    | -3.753986 | -1.122514 | 2.998240  |
| H    | -4.866349 | -0.521492 | 1.920185  |
| Ni   | -0.082122 | -0.131769 | -0.671176 |

**Table S5.** The Cartesian coordinates of  $[\text{Cd}(\text{CHZ})_2]^{2+}$  of the optimized structure under the level of m062x/def2tzvp.

| Atom | x         | y         | z         |
|------|-----------|-----------|-----------|
| O    | 2.062363  | -0.884412 | -0.708648 |
| N    | 2.080081  | 1.032815  | 1.223851  |
| N    | 3.244217  | 0.522423  | 0.652269  |
| N    | 4.308487  | -0.893622 | -0.797981 |
| N    | 5.518326  | -0.389691 | -0.331515 |
| C    | 3.151223  | -0.437508 | -0.300446 |
| H    | 4.162345  | 0.848792  | 0.926149  |
| H    | 2.111954  | 0.916323  | 2.232881  |
| H    | 1.991594  | 2.027778  | 1.029710  |
| H    | 4.254703  | -1.610658 | -1.509536 |
| H    | 6.039511  | 0.040772  | -1.087233 |
| H    | 6.073900  | -1.127480 | 0.086986  |
| N    | -0.792052 | 0.859844  | -2.017859 |
| O    | -0.850290 | 1.914346  | 0.484055  |
| N    | -0.693727 | -1.276026 | 2.085111  |
| O    | -1.508427 | -1.489075 | -0.479670 |
| C    | -1.499326 | 2.476220  | -0.407769 |
| C    | -1.994190 | -2.266886 | 0.345592  |
| N    | -2.928871 | -3.179283 | 0.040417  |
| N    | -3.392996 | -3.271384 | -1.265301 |
| N    | -2.221968 | 3.588489  | -0.196366 |
| N    | -2.288577 | 4.134926  | 1.078029  |
| N    | -1.590753 | -2.258496 | 1.658348  |
| N    | -1.517794 | 2.005016  | -1.692408 |
| H    | -2.115165 | -2.757931 | 2.361560  |
| H    | -1.163294 | -0.599992 | 2.684622  |
| H    | 0.052066  | -1.717403 | 2.615332  |
| H    | -3.231311 | -3.845274 | 0.738975  |
| H    | -4.400176 | -3.170990 | -1.284433 |
| H    | -3.122965 | -4.156592 | -1.677213 |
| H    | -0.152364 | 1.055496  | -2.781687 |
| H    | -1.415756 | 0.098621  | -2.281480 |
| H    | -2.136285 | 2.399900  | -2.385009 |
| H    | -2.681430 | 4.045209  | -0.972872 |
| H    | -3.249645 | 4.173554  | 1.393990  |
| H    | -1.882377 | 5.062464  | 1.087639  |
| Cd   | 0.150389  | -0.057615 | 0.074485  |

**Table S6.** The syngony, symmetry, band gaps, cell parameters, selected atomic charges, typical bond lengths and bond angles of crystal CHZ, [CHZ<sup>+</sup>(ClO<sub>4</sub><sup>-</sup>)] and MCPs.

|               | CHZ                         | [CHZ <sup>+</sup> (ClO <sub>4</sub> <sup>-</sup> )] | MnCP                          | FeCP                          | CoCP                          | NiCP                         | ZnCP                          | CdCP                          |
|---------------|-----------------------------|-----------------------------------------------------|-------------------------------|-------------------------------|-------------------------------|------------------------------|-------------------------------|-------------------------------|
| syngony       | monoclinic                  | monoclinic                                          | monoclinic                    | monoclinic                    | monoclinic                    | monoclinic                   | monoclinic                    | monoclinic                    |
| Space group   | P2/C                        | P21/C                                               | P21/N                         | P21/N                         | P21/N                         | P21/C                        | P21/N                         | P21/C                         |
| Band gap (eV) | 5.18                        | 5.18                                                | 4.11<br>(3.33) <sup>1</sup>   | 3.66<br>(2.74) <sup>1</sup>   | 3.70<br>(1.73) <sup>1</sup>   | 3.77<br>(1.79) <sup>1</sup>  | 4.91                          | 4.56                          |
| <i>a</i> (Å)  | 9.05<br>(3.72) <sup>2</sup> | 11.15<br>(10.00) <sup>2</sup>                       | 11.04<br>(10.20) <sup>2</sup> | 10.54<br>(10.07) <sup>2</sup> | 10.47<br>(10.05) <sup>2</sup> | 10.46<br>(9.97) <sup>2</sup> | 10.51<br>(10.00) <sup>2</sup> | 10.53<br>(10.28) <sup>2</sup> |
| <i>b</i> (Å)  | 4.66<br>(8.82)              | 7.41<br>(8.42)                                      | 8.74<br>(8.59)                | 8.82<br>(8.46)                | 8.72<br>(8.54)                | 8.76<br>(8.56)               | 8.72<br>(8.43)                | 8.97<br>(8.62)                |
| <i>c</i> (Å)  | 10.65<br>(11.96)            | 9.41<br>(21.21)                                     | 21.29<br>(21.41)              | 22.10<br>(21.19)              | 22.18<br>(21.43)              | 22.61<br>(21.43)             | 22.17<br>(21.22)              | 23.53<br>(21.36)              |
| $\alpha$ (°)  | 90.00                       | 90.00                                               | 90.00                         | 90.00                         | 90.00                         | 90.00                        | 90.00                         | 90.00                         |
| $\beta$ (°)   | 96.93                       | 109.40                                              | 97.73                         | 99.57                         | 99.75                         | 107.50                       | 99.89                         | 109.39                        |
| $\gamma$ (°)  | 90.00                       | 90.00                                               | 90.00                         | 90.00                         | 90.00                         | 90.00                        | 90.00                         | 90.00                         |

<sup>1</sup>. The value in bracket is the band gap of spin-down electrons;

<sup>2</sup>. The values in brackets are the experimental results.



**Table S7.** The temperature of ions ( $T_{ion}$ ), kinetic energies of virtual electrons ( $e_{kinc}$ ) and the total electronic energies ( $e_{tot}$ ) of MCPs ( $M^{2+}$  =  $Mn^{2+}$ ,  $Fe^{2+}$ ,  $Co^{2+}$ ,  $Ni^{2+}$  and  $Cd^{2+}$ ).

|             | MnCP                  | FeCP                  | CoCP                  | NiCP                  | CdCP                  |
|-------------|-----------------------|-----------------------|-----------------------|-----------------------|-----------------------|
| Tions (K)   | 60.83                 | 11.70                 | 51.59                 | 16.50                 | 124.35                |
| ekinc (a.u) | $1.99 \times 10^{-1}$ | $1.19 \times 10^{-2}$ | $1.04 \times 10^{-1}$ | $6.81 \times 10^{-3}$ | $1.46 \times 10^{-2}$ |
| etot (a.u)  | -1842.57              | -1923.89              | -1996.54              | -2091.19              | -1723.48              |
